# Supplementary material for: Beef cattle that respond differently to fescue toxicosis have distinct gastrointestinal tract microbiota
Source: PubMed Central journal article supplement (PMC7377488; doi:10.1371/journal.pone.0229192), 2020-07-23
Supplement: pone.0229192.s001.pdf [file pone.0229192.s001.pdf]

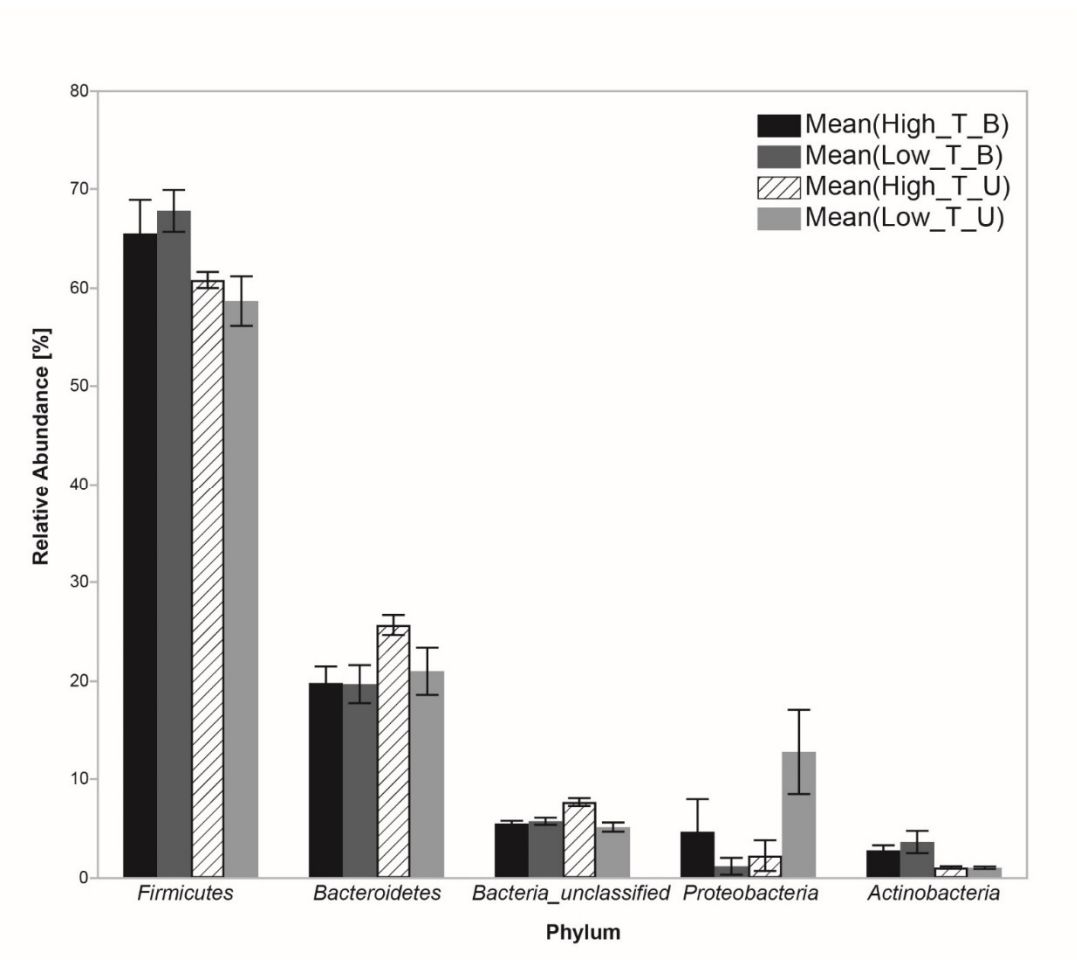

**Figure S1:** Mean relative abundance of the five most abundant bacterial phyla across all sample sites and groups. The error bars represent SEM.
