# Supplementary material for: Beef cattle that respond differently to fescue toxicosis have distinct gastrointestinal tract microbiota
Source: PubMed Central journal article supplement (PMC7377488; doi:10.1371/journal.pone.0229192), 2020-07-23
Supplement: pone.0229192.s002.pdf [file pone.0229192.s002.pdf]

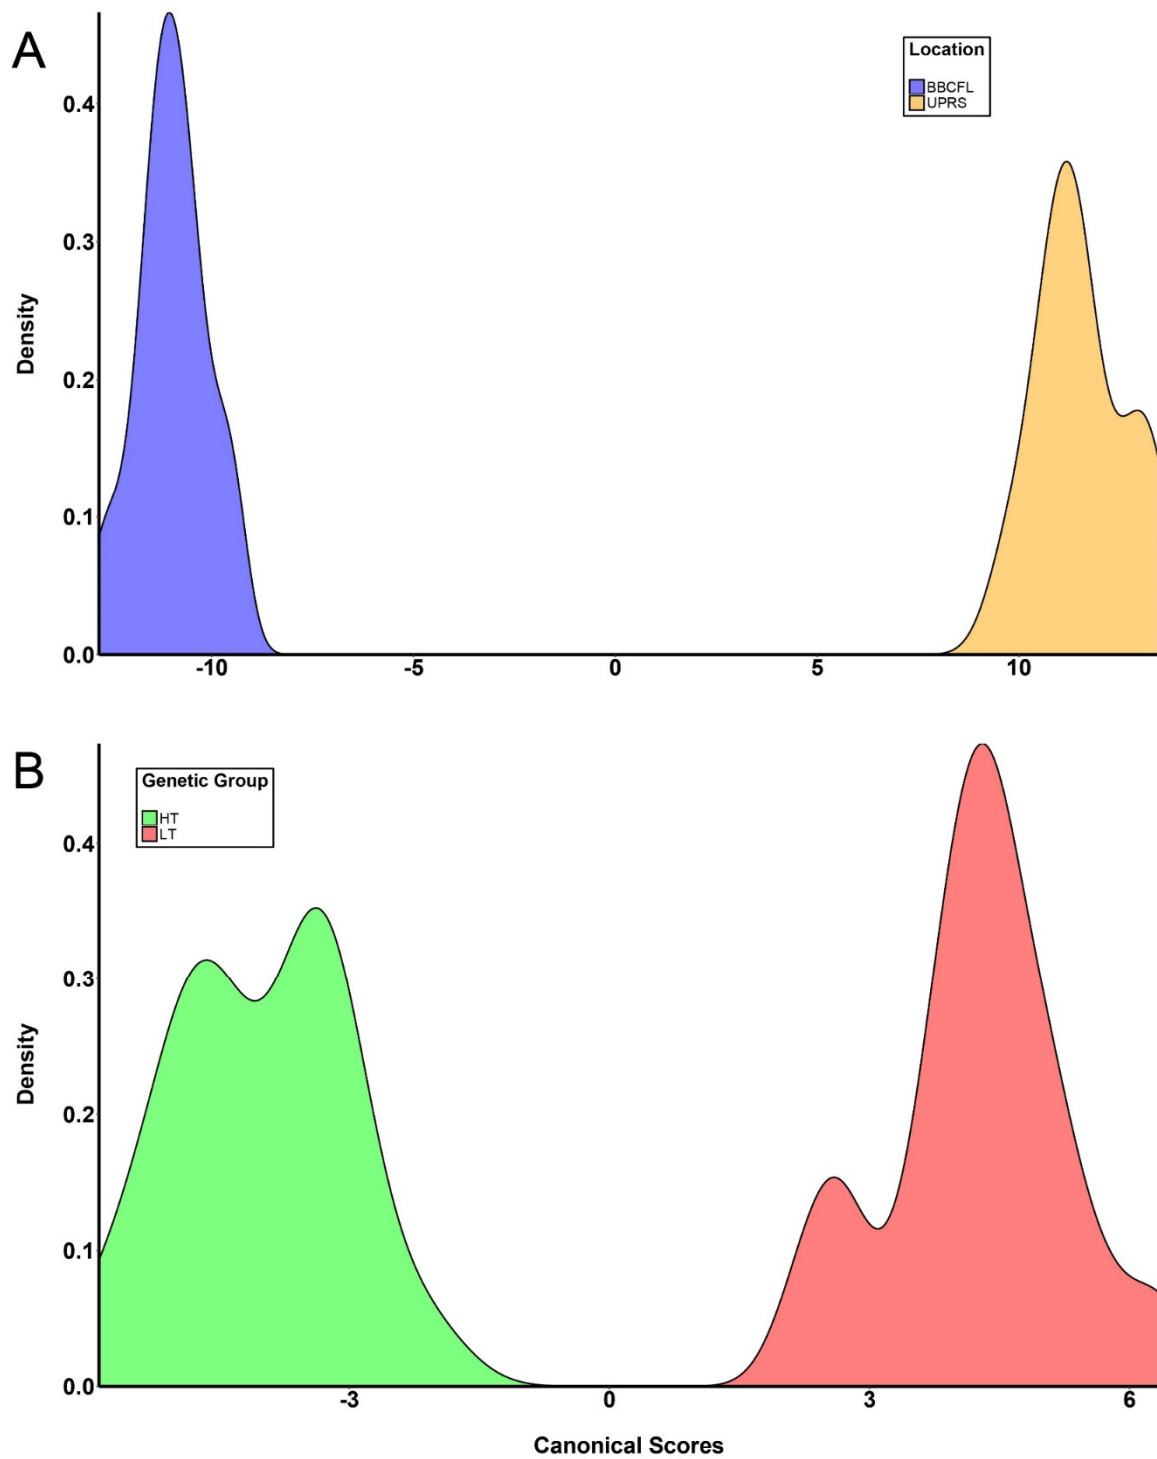

**Figure S2:** Canonical discriminant analysis (CDA) for response to fescue toxicosis (FT). For A, CDA was performed to discriminate animals based on location group (L): BBCFLL and UPRS can be found in blue and gold, respectively. For A, CDA was performed to discriminate animals based on genetic group (G): High (HT) and Low tolerance to FT can be found in green and red, respectively. For A, the x-axis represents the CS for CAN 1 and y-axis represent the density of the CS data.
