# Supplementary material for: Beef cattle that respond differently to fescue toxicosis have distinct gastrointestinal tract microbiota
Source: PubMed Central journal article supplement (PMC7377488; doi:10.1371/journal.pone.0229192), 2020-07-23
Supplement: pone.0229192.s003.pdf [file pone.0229192.s003.pdf]

**Table S1: Probability values and adjusted FDR (q-values) values for the 50 most abundant bacterial and fungal OTUs for Location effect, Tolerance effect and the interaction (L\*T) between the two effects. Cells shaded grey are statistically significantly (q < 0.05) different for the specific effect**

| Method | OTU   | Location | P-value  | q-values |  | Tolerance | P-value  | q-values |  | Interaction | P-value  | q-values |
|--------|-------|----------|----------|----------|--|-----------|----------|----------|--|-------------|----------|----------|
| 16S    | OTU01 | L        | 0.098975 | 0.216675 |  | T         | 0.860291 | 0.740793 |  | L*T         | 0.302872 | 0.208735 |
| 16S    | OTU02 | L        | 0.11427  | 0.243576 |  | T         | 0.219462 | 0.388454 |  | L*T         | 0.066066 | 0.117503 |
| 16S    | OTU03 | L        | 0.022894 | 0.06623  |  | T         | 1.60E-05 | 0.000127 |  | L*T         | 0.321515 | 0.216902 |
| 16S    | OTU04 | L        | 0.26953  | 0.507719 |  | T         | 0.405114 | 0.533222 |  | L*T         | 0.232149 | 0.185378 |
| 16S    | OTU05 | L        | 0.140452 | 0.284416 |  | T         | 0.515098 | 0.623484 |  | L*T         | 0.252217 | 0.189784 |
| 16S    | OTU06 | L        | 0.749982 | 0.905251 |  | T         | 0.379597 | 0.531536 |  | L*T         | 0.01195  | 0.031171 |
| 16S    | OTU07 | L        | 0.051852 | 0.135484 |  | T         | 0.971162 | 0.763994 |  | L*T         | 0.547352 | 0.334638 |
| 16S    | OTU08 | L        | 0.899786 | 0.991741 |  | T         | 0.963404 | 0.763994 |  | L*T         | 0.285274 | 0.204206 |
| 16S    | OTU09 | L        | 0.001529 | 0.008318 |  | T         | 0.061462 | 0.145054 |  | L*T         | 0.083259 | 0.124869 |
| 16S    | OTU10 | L        | 0.00119  | 0.008035 |  | T         | 0.194128 | 0.353429 |  | L*T         | 0.153796 | 0.158362 |
| 16S    | OTU11 | L        | 0.799462 | 0.925092 |  | T         | 0.383714 | 0.531536 |  | L*T         | 0.048845 | 0.09101  |
| 16S    | OTU12 | L        | 0.975449 | 0.991741 |  | T         | 0.510285 | 0.623484 |  | L*T         | 0.910453 | 0.463655 |
| 16S    | OTU13 | L        | 0.316126 | 0.540612 |  | T         | 0.575249 | 0.637349 |  | L*T         | 0.274168 | 0.202409 |
| 16S    | OTU14 | L        | 0.457246 | 0.698809 |  | T         | 0.171823 | 0.324899 |  | L*T         | 0.169697 | 0.158474 |
| 16S    | OTU15 | L        | 0.457064 | 0.698809 |  | T         | 0.536322 | 0.63287  |  | L*T         | 0.000623 | 0.004065 |
| 16S    | OTU16 | L        | 0.823331 | 0.939293 |  | T         | 0.762848 | 0.68464  |  | L*T         | 0.58848  | 0.354248 |
| 16S    | OTU17 | L        | 0.525778 | 0.744878 |  | T         | 0.891622 | 0.757535 |  | L*T         | 0.110629 | 0.134785 |
| 16S    | OTU18 | L        | 0.574342 | 0.764101 |  | T         | 0.929977 | 0.763994 |  | L*T         | 0.017177 | 0.039535 |
| 16S    | OTU19 | L        | 0.003465 | 0.015188 |  | T         | 0.407167 | 0.533222 |  | L*T         | 0.006682 | 0.023774 |
| 16S    | OTU20 | L        | 0.507666 | 0.744878 |  | T         | 0.001047 | 0.004767 |  | L*T         | 0.00118  | 0.006593 |
| 16S    | OTU21 | L        | 0.004944 | 0.020022 |  | T         | 0.251621 | 0.400839 |  | L*T         | 0.944001 | 0.463655 |
| 16S    | OTU22 | L        | 0.796012 | 0.925092 |  | T         | 0.436583 | 0.55639  |  | L*T         | 0.17422  | 0.158474 |
| 16S    | OTU23 | L        | 0.411549 | 0.66671  |  | T         | 0.056848 | 0.139323 |  | L*T         | 0.074127 | 0.118063 |
| 16S    | OTU24 | L        | 0.942812 | 0.991741 |  | T         | 0.055112 | 0.139323 |  | L*T         | 0.28704  | 0.204206 |
| 16S    | OTU25 | L        | 0.001751 | 0.008863 |  | T         | 0.832162 | 0.726387 |  | L*T         | 0.093405 | 0.126026 |
| 16S    | OTU26 | L        | 0.071382 | 0.175211 |  | T         | 0.619014 | 0.637349 |  | L*T         | 0.009107 | 0.025453 |
| 16S    | OTU27 | L        | 0.472442 | 0.708664 |  | T         | 0.017104 | 0.04954  |  | L*T         | 0.007899 | 0.023774 |
| 16S    | OTU28 | L        | 0.970189 | 0.991741 |  | T         | 0.620209 | 0.637349 |  | L*T         | 0.174612 | 0.158474 |
| 16S    | OTU29 | L        | 0.024488 | 0.068396 |  | T         | 0.297179 | 0.440385 |  | L*T         | 0.454584 | 0.286887 |
| 16S    | OTU30 | L        | 0.148468 | 0.293315 |  | T         | 0.76127  | 0.68464  |  | L*T         | 0.163047 | 0.158474 |
| 16S    | OTU31 | L        | 0.584868 | 0.764101 |  | T         | 0.605779 | 0.637349 |  | L*T         | 0.304076 | 0.208735 |
| 16S    | OTU32 | L        | 0.53337  | 0.744878 |  | T         | 0.816881 | 0.722951 |  | L*T         | 0.139428 | 0.147448 |
| 16S    | OTU33 | L        | 0.021649 | 0.064946 |  | T         | 0.641273 | 0.637349 |  | L*T         | 0.071071 | 0.118063 |
| 16S    | OTU34 | L        | 0.212998 | 0.410782 |  | T         | 0.574674 | 0.637349 |  | L*T         | 0.104068 | 0.134785 |
| 16S    | OTU35 | L        | 0.686634 | 0.842687 |  | T         | 0.960423 | 0.763994 |  | L*T         | 0.837595 | 0.438688 |
| 16S    | OTU36 | L        | 1.23E-06 | 1.99E-05 |  | T         | 0.640607 | 0.637349 |  | L*T         | 0.241885 | 0.187424 |
| 16S    | OTU37 | L        | 0.579914 | 0.764101 |  | T         | 0.734437 | 0.68464  |  | L*T         | 0.184782 | 0.158474 |
| 16S    | OTU38 | L        | 0.759964 | 0.905251 |  | T         | 0.019128 | 0.052995 |  | L*T         | 0.007263 | 0.023774 |

|     |       |   |          |          |  |   |          |          |  |     |          |          |
|-----|-------|---|----------|----------|--|---|----------|----------|--|-----|----------|----------|
| 16S | OTU39 | L | 0.529594 | 0.744878 |  | T | 0.288594 | 0.440385 |  | L*T | 0.170991 | 0.158474 |
| 16S | OTU40 | L | 0.401337 | 0.663435 |  | T | 0.246879 | 0.400839 |  | L*T | 0.766986 | 0.416816 |
| 16S | OTU41 | L | 0.453218 | 0.698809 |  | T | 0.140312 | 0.2794   |  | L*T | 0.196463 | 0.160151 |
| 16S | OTU42 | L | 0.954269 | 0.991741 |  | T | 0.752793 | 0.68464  |  | L*T | 0.086165 | 0.124869 |
| 16S | OTU43 | L | 0.000126 | 0.001452 |  | T | 0.247813 | 0.400839 |  | L*T | 0.091452 | 0.126026 |
| 16S | OTU44 | L | 0.312268 | 0.540612 |  | T | 0.518583 | 0.623484 |  | L*T | 0.184449 | 0.158474 |
| 16S | OTU45 | L | 0.003236 | 0.015188 |  | T | 0.574436 | 0.637349 |  | L*T | 0.003687 | 0.016029 |
| 16S | OTU46 | L | 0.892628 | 0.991741 |  | T | 0.29324  | 0.440385 |  | L*T | 0.696756 | 0.389468 |
| 16S | OTU47 | L | 0.016355 | 0.051988 |  | T | 0.592498 | 0.637349 |  | L*T | 0.928212 | 0.463655 |
| 16S | OTU48 | L | 0.016688 | 0.051988 |  | T | 0.410035 | 0.533222 |  | L*T | 0.840868 | 0.438688 |
| 16S | OTU49 | L | 0.320363 | 0.540612 |  | T | 0.926112 | 0.763994 |  | L*T | 0.624912 | 0.363909 |
| 16S | OTU50 | L | 0.001459 | 0.008318 |  | T | 0.757494 | 0.68464  |  | L*T | 0.113675 | 0.134785 |
| ITS | OTU01 | L | 1.56E-07 | 4.20E-06 |  | T | 0.000995 | 0.004767 |  | L*T | 0.190356 | 0.158474 |
| ITS | OTU02 | L | 0.555138 | 0.762138 |  | T | 1.23E-09 | 2.61E-08 |  | L*T | 0.190321 | 0.158474 |
| ITS | OTU03 | L | 0.011638 | 0.040985 |  | T | 3.60E-05 | 0.000229 |  | L*T | 0.075434 | 0.118063 |
| ITS | OTU04 | L | 0.014225 | 0.04801  |  | T | 5.46E-11 | 1.74E-09 |  | L*T | 2.28E-05 | 0.000298 |
| ITS | OTU05 | L | 9.32E-12 | 7.55E-10 |  | T | 2.35E-08 | 2.99E-07 |  | L*T | 0.007509 | 0.023774 |
| ITS | OTU06 | L | 0.005561 | 0.021448 |  | T | 2.38E-13 | 1.52E-11 |  | L*T | 1.51E-06 | 5.90E-05 |
| ITS | OTU07 | L | 2.19E-07 | 4.43E-06 |  | T | 0.238885 | 0.400839 |  | L*T | 0.452412 | 0.286887 |
| ITS | OTU08 | L | 0.003563 | 0.015188 |  | T | 0.332126 | 0.480987 |  | L*T | 5.25E-06 | 0.000103 |
| ITS | OTU10 | L | 0.067966 | 0.172038 |  | T | 0.001812 | 0.007699 |  | L*T | 0.021149 | 0.045974 |
| ITS | OTU11 | L | 0.318137 | 0.540612 |  | T | 0.650141 | 0.637349 |  | L*T | 0.24429  | 0.187424 |
| ITS | OTU12 | L | 7.78E-10 | 3.15E-08 |  | T | 8.66E-09 | 1.38E-07 |  | L*T | 0.001711 | 0.00837  |
| ITS | OTU13 | L | 0.962469 | 0.991741 |  | T | 0.016418 | 0.04954  |  | L*T | 0.108505 | 0.134785 |
| ITS | OTU14 | L | 0.011027 | 0.0406   |  | T | 0.002687 | 0.010701 |  | L*T | 0.60605  | 0.359297 |
| ITS | OTU15 | L | 0.306404 | 0.540612 |  | T | 0.087452 | 0.185752 |  | L*T | 5.69E-05 | 0.000557 |
| ITS | OTU16 | L | 0.990622 | 0.991741 |  | T | 0.003626 | 0.013591 |  | L*T | 0.000121 | 0.00095  |
| ITS | OTU17 | L | 0.000567 | 0.004176 |  | T | 2.87E-05 | 0.000203 |  | L*T | 0.024222 | 0.049883 |
| ITS | OTU19 | L | 0.68386  | 0.842687 |  | T | 0.637607 | 0.637349 |  | L*T | 0.998959 | 0.482561 |
| ITS | OTU20 | L | 0.956295 | 0.991741 |  | T | 0.000952 | 0.004767 |  | L*T | 0.63243  | 0.363909 |
| ITS | OTU21 | L | 0.133129 | 0.276498 |  | T | 0.173358 | 0.324899 |  | L*T | 0.137253 | 0.147448 |
| ITS | OTU22 | L | 0.084967 | 0.196638 |  | T | 0.016191 | 0.04954  |  | L*T | 0.747654 | 0.412033 |
| ITS | OTU24 | L | 0.092698 | 0.20857  |  | T | 0.021663 | 0.057515 |  | L*T | 0.368463 | 0.244361 |
| ITS | OTU25 | L | 1.24E-05 | 0.000167 |  | T | 0.071638 | 0.157408 |  | L*T | 0.947973 | 0.463655 |
| ITS | OTU26 | L | 0.000327 | 0.002771 |  | T | 0.004185 | 0.014815 |  | L*T | 0.831647 | 0.438688 |
| ITS | OTU27 | L | 0.037    | 0.099899 |  | T | 0.000299 | 0.00173  |  | L*T | 0.014022 | 0.034291 |
| ITS | OTU31 | L | 0.596563 | 0.76701  |  | T | 0.011809 | 0.039603 |  | L*T | 0.491424 | 0.305214 |
| ITS | OTU34 | L | 0.000185 | 0.001876 |  | T | 0.961313 | 0.763994 |  | L*T | 0.383905 | 0.250358 |
| ITS | OTU36 | L | 0.991741 | 0.991741 |  | T | 0.136528 | 0.2794   |  | L*T | 0.946189 | 0.463655 |
| ITS | OTU38 | L | 0.000342 | 0.002771 |  | T | 6.06E-06 | 5.52E-05 |  | L*T | 0.035328 | 0.069115 |
| ITS | OTU42 | L | 0.658321 | 0.833187 |  | T | 0.75984  | 0.68464  |  | L*T | 0.671263 | 0.380656 |
| ITS | OTU44 | L | 0.078933 | 0.188047 |  | T | 0.063921 | 0.145469 |  | L*T | 0.118605 | 0.136494 |
| ITS | OTU49 | L | 0.00154  | 0.008318 |  | T | 4.87E-07 | 5.17E-06 |  | L*T | 0.123355 | 0.137904 |
