# Supplementary material for: Beef cattle that respond differently to fescue toxicosis have distinct gastrointestinal tract microbiota
Source: PubMed Central journal article supplement (PMC7377488; doi:10.1371/journal.pone.0229192), 2020-07-23
Supplement: pone.0229192.s004.pdf [file pone.0229192.s004.pdf]

**Table S2: Log2 Fold Change values for the 50 most abundant bacterial and fungal OTUs for all combinations of Location, Tolerance and their interactions (T\*L). Fungal OTUs highlighted in grey demonstrate significant interaction between Tolerance and Location but share directionality of the Location effect as noted in the manuscript and Fig. 3.**

| Method | OTU   | Effect | Location 1 | Location 2 | Tolerance Group 1 | Tolerance Group 2 | log2FC   | Lower 95p CI | Upper 95p CI |
|--------|-------|--------|------------|------------|-------------------|-------------------|----------|--------------|--------------|
| 16S    | OTU01 | L      | Butner     | UPRS       |                   |                   | -0.23255 | -0.51132     | 0.046214     |
| 16S    | OTU01 | T      |            |            | High T            | Low T             | -0.02013 | -0.25119     | 0.210935     |
| 16S    | OTU01 | L*T    | Butner     | Butner     | High T            | Low T             | 0.122171 | -0.25625     | 0.500597     |
| 16S    | OTU01 | L*T    | Butner     | UPRS       | High T            | High T            | -0.09025 | -0.41826     | 0.237756     |
| 16S    | OTU01 | L*T    | Butner     | UPRS       | High T            | Low T             | -0.25268 | -0.59125     | 0.085896     |
| 16S    | OTU01 | L*T    | Butner     | UPRS       | Low T             | High T            | -0.21243 | -0.59657     | 0.171719     |
| 16S    | OTU01 | L*T    | Butner     | UPRS       | Low T             | Low T             | -0.37485 | -0.82325     | 0.073552     |
| 16S    | OTU01 | L*T    | UPRS       | UPRS       | High T            | Low T             | -0.16242 | -0.5042      | 0.179347     |
| 16S    | OTU02 | L      | Butner     | UPRS       |                   |                   | 1.155745 | -0.29422     | 2.605707     |
| 16S    | OTU02 | T      |            |            | High T            | Low T             | -0.85266 | -2.23933     | 0.534008     |
| 16S    | OTU02 | L*T    | Butner     | Butner     | High T            | Low T             | -2.72997 | -5.56084     | 0.100895     |
| 16S    | OTU02 | L*T    | Butner     | UPRS       | High T            | High T            | -0.72157 | -3.04253     | 1.599394     |
| 16S    | OTU02 | L*T    | Butner     | UPRS       | High T            | Low T             | 0.303086 | -1.72776     | 2.333929     |
| 16S    | OTU02 | L*T    | Butner     | UPRS       | Low T             | High T            | 2.008404 | 0.026955     | 3.989854     |
| 16S    | OTU02 | L*T    | Butner     | UPRS       | Low T             | Low T             | 3.033059 | 0.407538     | 5.658581     |
| 16S    | OTU02 | L*T    | UPRS       | UPRS       | High T            | Low T             | 1.024655 | -0.95204     | 3.001353     |
| 16S    | OTU03 | L      | Butner     | UPRS       |                   |                   | -2.48604 | -4.60461     | -0.36748     |
| 16S    | OTU03 | T      |            |            | High T            | Low T             | 4.387014 | 2.62636      | 6.147668     |
| 16S    | OTU03 | L*T    | Butner     | Butner     | High T            | Low T             | 5.526475 | 2.741633     | 8.311316     |
| 16S    | OTU03 | L*T    | Butner     | UPRS       | High T            | High T            | -1.34658 | -3.92309     | 1.229924     |
| 16S    | OTU03 | L*T    | Butner     | UPRS       | High T            | Low T             | 1.900971 | -0.87891     | 4.680856     |
| 16S    | OTU03 | L*T    | Butner     | UPRS       | Low T             | High T            | -6.87306 | -9.60228     | -4.14383     |
| 16S    | OTU03 | L*T    | Butner     | UPRS       | Low T             | Low T             | -3.6255  | -7.2261      | -0.02491     |
| 16S    | OTU03 | L*T    | UPRS       | UPRS       | High T            | Low T             | 3.247553 | 0.235827     | 6.259279     |
| 16S    | OTU04 | L      | Butner     | UPRS       |                   |                   | 1.166088 | -0.94782     | 3.279993     |
| 16S    | OTU04 | T      |            |            | High T            | Low T             | -0.72757 | -2.48419     | 1.029047     |
| 16S    | OTU04 | L*T    | Butner     | Butner     | High T            | Low T             | -1.88246 | -4.79518     | 1.030253     |
| 16S    | OTU04 | L*T    | Butner     | UPRS       | High T            | High T            | 0.011197 | -2.32155     | 2.343945     |
| 16S    | OTU04 | L*T    | Butner     | UPRS       | High T            | Low T             | 0.438517 | -1.97276     | 2.849796     |
| 16S    | OTU04 | L*T    | Butner     | UPRS       | Low T             | High T            | 1.893658 | -1.155       | 4.94232      |
| 16S    | OTU04 | L*T    | Butner     | UPRS       | Low T             | Low T             | 2.320978 | -0.98911     | 5.631065     |
| 16S    | OTU04 | L*T    | UPRS       | UPRS       | High T            | Low T             | 0.42732  | -1.84176     | 2.696396     |
| 16S    | OTU05 | L      | Butner     | UPRS       |                   |                   | -0.19505 | -0.45789     | 0.067789     |
| 16S    | OTU05 | T      |            |            | High T            | Low T             | 0.070643 | -0.14797     | 0.289253     |
| 16S    | OTU05 | L*T    | Butner     | Butner     | High T            | Low T             | 0.219277 | -0.13812     | 0.576675     |
| 16S    | OTU05 | L*T    | Butner     | UPRS       | High T            | High T            | -0.04642 | -0.35491     | 0.262079     |

|     |       |     |        |        |        |        |          |          |          |
|-----|-------|-----|--------|--------|--------|--------|----------|----------|----------|
| 16S | OTU05 | L*T | Butner | UPRS   | High T | Low T  | -0.12441 | -0.44294 | 0.194127 |
| 16S | OTU05 | L*T | Butner | UPRS   | Low T  | High T | -0.26569 | -0.6294  | 0.098017 |
| 16S | OTU05 | L*T | Butner | UPRS   | Low T  | Low T  | -0.34368 | -0.76538 | 0.078016 |
| 16S | OTU05 | L*T | UPRS   | UPRS   | High T | Low T  | -0.07799 | -0.39842 | 0.242445 |
| 16S | OTU06 | L   | Butner | UPRS   |        |        | 0.09357  | -0.49941 | 0.686548 |
| 16S | OTU06 | T   |        |        | High T | Low T  | 0.209729 | -0.26975 | 0.689212 |
| 16S | OTU06 | L*T | Butner | Butner | High T | Low T  | 0.951984 | 0.182552 | 1.721416 |
| 16S | OTU06 | L*T | Butner | UPRS   | High T | High T | 0.835825 | 0.162048 | 1.509601 |
| 16S | OTU06 | L*T | Butner | UPRS   | High T | Low T  | 0.303299 | -0.41083 | 1.017423 |
| 16S | OTU06 | L*T | Butner | UPRS   | Low T  | High T | -0.11616 | -0.92429 | 0.691976 |
| 16S | OTU06 | L*T | Butner | UPRS   | Low T  | Low T  | -0.64868 | -1.59355 | 0.296185 |
| 16S | OTU06 | L*T | UPRS   | UPRS   | High T | Low T  | -0.53253 | -1.24757 | 0.182519 |
| 16S | OTU07 | L   | Butner | UPRS   |        |        | -0.39483 | -0.79302 | 0.003364 |
| 16S | OTU07 | T   |        |        | High T | Low T  | -0.006   | -0.3415  | 0.329502 |
| 16S | OTU07 | L*T | Butner | Butner | High T | Low T  | 0.113895 | -0.43131 | 0.659103 |
| 16S | OTU07 | L*T | Butner | UPRS   | High T | High T | -0.27493 | -0.77002 | 0.220153 |
| 16S | OTU07 | L*T | Butner | UPRS   | High T | Low T  | -0.40083 | -0.90261 | 0.100943 |
| 16S | OTU07 | L*T | Butner | UPRS   | Low T  | High T | -0.38883 | -0.92778 | 0.150118 |
| 16S | OTU07 | L*T | Butner | UPRS   | Low T  | Low T  | -0.51473 | -1.14281 | 0.11336  |
| 16S | OTU07 | L*T | UPRS   | UPRS   | High T | Low T  | -0.1259  | -0.62626 | 0.374463 |
| 16S | OTU08 | L   | Butner | UPRS   |        |        | 0.024388 | -0.36698 | 0.415753 |
| 16S | OTU08 | T   |        |        | High T | Low T  | -0.00753 | -0.3393  | 0.324239 |
| 16S | OTU08 | L*T | Butner | Butner | High T | Low T  | 0.205887 | -0.33742 | 0.749197 |
| 16S | OTU08 | L*T | Butner | UPRS   | High T | High T | 0.237807 | -0.24402 | 0.719634 |
| 16S | OTU08 | L*T | Butner | UPRS   | High T | Low T  | 0.016857 | -0.46756 | 0.501272 |
| 16S | OTU08 | L*T | Butner | UPRS   | Low T  | High T | 0.03192  | -0.50828 | 0.572121 |
| 16S | OTU08 | L*T | Butner | UPRS   | Low T  | Low T  | -0.18903 | -0.8169  | 0.438835 |
| 16S | OTU08 | L*T | UPRS   | UPRS   | High T | Low T  | -0.22095 | -0.71592 | 0.274022 |
| 16S | OTU09 | L   | Butner | UPRS   |        |        | -1.93005 | -3.06453 | -0.79556 |
| 16S | OTU09 | T   |        |        | High T | Low T  | 0.895418 | -0.04561 | 1.836443 |
| 16S | OTU09 | L*T | Butner | Butner | High T | Low T  | 1.898654 | 0.30772  | 3.489588 |
| 16S | OTU09 | L*T | Butner | UPRS   | High T | High T | -0.92681 | -2.19714 | 0.343522 |
| 16S | OTU09 | L*T | Butner | UPRS   | High T | Low T  | -1.03463 | -2.3556  | 0.286345 |
| 16S | OTU09 | L*T | Butner | UPRS   | Low T  | High T | -2.82546 | -4.43798 | -1.21294 |
| 16S | OTU09 | L*T | Butner | UPRS   | Low T  | Low T  | -2.93328 | -4.82353 | -1.04303 |
| 16S | OTU09 | L*T | UPRS   | UPRS   | High T | Low T  | -0.10782 | -1.46893 | 1.253298 |
| 16S | OTU10 | L   | Butner | UPRS   |        |        | -0.65787 | -1.0345  | -0.28123 |
| 16S | OTU10 | T   |        |        | High T | Low T  | -0.20439 | -0.51829 | 0.10951  |
| 16S | OTU10 | L*T | Butner | Butner | High T | Low T  | 0.072358 | -0.45501 | 0.599726 |
| 16S | OTU10 | L*T | Butner | UPRS   | High T | High T | -0.38112 | -0.82937 | 0.067125 |
| 16S | OTU10 | L*T | Butner | UPRS   | High T | Low T  | -0.86226 | -1.31758 | -0.40693 |

|     |       |     |        |        |        |        |          |          |          |
|-----|-------|-----|--------|--------|--------|--------|----------|----------|----------|
| 16S | OTU10 | L*T | Butner | UPRS   | Low T  | High T | -0.45348 | -0.97641 | 0.069446 |
| 16S | OTU10 | L*T | Butner | UPRS   | Low T  | Low T  | -0.93461 | -1.55152 | -0.31771 |
| 16S | OTU10 | L*T | UPRS   | UPRS   | High T | Low T  | -0.48113 | -0.94668 | -0.01558 |
| 16S | OTU11 | L   | Butner | UPRS   |        |        | 0.092835 | -0.64535 | 0.831021 |
| 16S | OTU11 | T   |        |        | High T | Low T  | 0.252713 | -0.33012 | 0.835547 |
| 16S | OTU11 | L*T | Butner | Butner | High T | Low T  | 0.951297 | 0.01187  | 1.890723 |
| 16S | OTU11 | L*T | Butner | UPRS   | High T | High T | 0.791418 | -0.02976 | 1.612593 |
| 16S | OTU11 | L*T | Butner | UPRS   | High T | Low T  | 0.345548 | -0.53828 | 1.22938  |
| 16S | OTU11 | L*T | Butner | UPRS   | Low T  | High T | -0.15988 | -1.15389 | 0.834137 |
| 16S | OTU11 | L*T | Butner | UPRS   | Low T  | Low T  | -0.60575 | -1.78094 | 0.569441 |
| 16S | OTU11 | L*T | UPRS   | UPRS   | High T | Low T  | -0.44587 | -1.31904 | 0.427303 |
| 16S | OTU12 | L   | Butner | UPRS   |        |        | 0.004225 | -0.27324 | 0.281687 |
| 16S | OTU12 | T   |        |        | High T | Low T  | -0.07708 | -0.3129  | 0.158732 |
| 16S | OTU12 | L*T | Butner | Butner | High T | Low T  | -0.06182 | -0.44258 | 0.318935 |
| 16S | OTU12 | L*T | Butner | UPRS   | High T | High T | 0.019486 | -0.31625 | 0.355224 |
| 16S | OTU12 | L*T | Butner | UPRS   | High T | Low T  | -0.07286 | -0.41361 | 0.267896 |
| 16S | OTU12 | L*T | Butner | UPRS   | Low T  | High T | 0.081309 | -0.30479 | 0.467412 |
| 16S | OTU12 | L*T | Butner | UPRS   | Low T  | Low T  | -0.01104 | -0.44881 | 0.426742 |
| 16S | OTU12 | L*T | UPRS   | UPRS   | High T | Low T  | -0.09235 | -0.43387 | 0.249181 |
| 16S | OTU13 | L   | Butner | UPRS   |        |        | -0.19235 | -0.57706 | 0.19237  |
| 16S | OTU13 | T   |        |        | High T | Low T  | -0.09045 | -0.41587 | 0.234979 |
| 16S | OTU13 | L*T | Butner | Butner | High T | Low T  | 0.123731 | -0.41053 | 0.65799  |
| 16S | OTU13 | L*T | Butner | UPRS   | High T | High T | 0.021834 | -0.4501  | 0.493765 |
| 16S | OTU13 | L*T | Butner | UPRS   | High T | Low T  | -0.28279 | -0.7578  | 0.192213 |
| 16S | OTU13 | L*T | Butner | UPRS   | Low T  | High T | -0.1019  | -0.63311 | 0.429314 |
| 16S | OTU13 | L*T | Butner | UPRS   | Low T  | Low T  | -0.40652 | -1.02361 | 0.210567 |
| 16S | OTU13 | L*T | UPRS   | UPRS   | High T | Low T  | -0.30463 | -0.78824 | 0.178985 |
| 16S | OTU14 | L   | Butner | UPRS   |        |        | -0.3959  | -1.46756 | 0.675752 |
| 16S | OTU14 | T   |        |        | High T | Low T  | 0.647867 | -0.29631 | 1.592044 |
| 16S | OTU14 | L*T | Butner | Butner | High T | Low T  | 1.439546 | -0.20569 | 3.084779 |
| 16S | OTU14 | L*T | Butner | UPRS   | High T | High T | 0.395775 | -0.83897 | 1.630522 |
| 16S | OTU14 | L*T | Butner | UPRS   | High T | Low T  | 0.251963 | -0.97706 | 1.480988 |
| 16S | OTU14 | L*T | Butner | UPRS   | Low T  | High T | -1.04377 | -2.64668 | 0.559142 |
| 16S | OTU14 | L*T | Butner | UPRS   | Low T  | Low T  | -1.18758 | -3.03353 | 0.658364 |
| 16S | OTU14 | L*T | UPRS   | UPRS   | High T | Low T  | -0.14381 | -1.45201 | 1.164384 |
| 16S | OTU15 | L   | Butner | UPRS   |        |        | 0.244219 | -0.41658 | 0.905015 |
| 16S | OTU15 | T   |        |        | High T | Low T  | 0.16475  | -0.37208 | 0.701578 |
| 16S | OTU15 | L*T | Butner | Butner | High T | Low T  | 1.325702 | 0.463959 | 2.187445 |
| 16S | OTU15 | L*T | Butner | UPRS   | High T | High T | 1.405171 | 0.671946 | 2.138396 |
| 16S | OTU15 | L*T | Butner | UPRS   | High T | Low T  | 0.408969 | -0.37296 | 1.190898 |
| 16S | OTU15 | L*T | Butner | UPRS   | Low T  | High T | 0.079469 | -0.8361  | 0.995034 |

|     |       |     |        |        |        |        |          |          |          |
|-----|-------|-----|--------|--------|--------|--------|----------|----------|----------|
| 16S | OTU15 | L*T | Butner | UPRS   | Low T  | Low T  | -0.91673 | -1.97168 | 0.138208 |
| 16S | OTU15 | L*T | UPRS   | UPRS   | High T | Low T  | -0.9962  | -1.77786 | -0.21455 |
| 16S | OTU16 | L   | Butner | UPRS   |        |        | -0.04681 | -0.4704  | 0.376779 |
| 16S | OTU16 | T   |        |        | High T | Low T  | 0.053262 | -0.30323 | 0.409755 |
| 16S | OTU16 | L*T | Butner | Butner | High T | Low T  | 0.169155 | -0.42328 | 0.761586 |
| 16S | OTU16 | L*T | Butner | UPRS   | High T | High T | 0.069082 | -0.43633 | 0.574493 |
| 16S | OTU16 | L*T | Butner | UPRS   | High T | Low T  | 0.006451 | -0.50794 | 0.520845 |
| 16S | OTU16 | L*T | Butner | UPRS   | Low T  | High T | -0.10007 | -0.69035 | 0.490207 |
| 16S | OTU16 | L*T | Butner | UPRS   | Low T  | Low T  | -0.1627  | -0.85302 | 0.527608 |
| 16S | OTU16 | L*T | UPRS   | UPRS   | High T | Low T  | -0.06263 | -0.58829 | 0.463027 |
| 16S | OTU17 | L   | Butner | UPRS   |        |        | -0.12937 | -0.54018 | 0.281433 |
| 16S | OTU17 | T   |        |        | High T | Low T  | -0.02334 | -0.36956 | 0.322875 |
| 16S | OTU17 | L*T | Butner | Butner | High T | Low T  | -0.35504 | -0.91999 | 0.209915 |
| 16S | OTU17 | L*T | Butner | UPRS   | High T | High T | -0.46107 | -0.96109 | 0.038949 |
| 16S | OTU17 | L*T | Butner | UPRS   | High T | Low T  | -0.15272 | -0.66277 | 0.357332 |
| 16S | OTU17 | L*T | Butner | UPRS   | Low T  | High T | -0.10603 | -0.66915 | 0.457094 |
| 16S | OTU17 | L*T | Butner | UPRS   | Low T  | Low T  | 0.202322 | -0.45084 | 0.855481 |
| 16S | OTU17 | L*T | UPRS   | UPRS   | High T | Low T  | 0.308352 | -0.20123 | 0.817933 |
| 16S | OTU18 | L   | Butner | UPRS   |        |        | 0.132521 | -0.34315 | 0.608191 |
| 16S | OTU18 | T   |        |        | High T | Low T  | 0.017369 | -0.3821  | 0.416836 |
| 16S | OTU18 | L*T | Butner | Butner | High T | Low T  | 0.60383  | -0.04482 | 1.25248  |
| 16S | OTU18 | L*T | Butner | UPRS   | High T | High T | 0.718982 | 0.157783 | 1.280181 |
| 16S | OTU18 | L*T | Butner | UPRS   | High T | Low T  | 0.149891 | -0.42733 | 0.727108 |
| 16S | OTU18 | L*T | Butner | UPRS   | Low T  | High T | 0.115152 | -0.54703 | 0.777339 |
| 16S | OTU18 | L*T | Butner | UPRS   | Low T  | Low T  | -0.45394 | -1.22159 | 0.313708 |
| 16S | OTU18 | L*T | UPRS   | UPRS   | High T | Low T  | -0.56909 | -1.16078 | 0.022602 |
| 16S | OTU19 | L   | Butner | UPRS   |        |        | -0.47537 | -0.78209 | -0.16865 |
| 16S | OTU19 | T   |        |        | High T | Low T  | -0.10639 | -0.36438 | 0.151607 |
| 16S | OTU19 | L*T | Butner | Butner | High T | Low T  | 0.338587 | -0.08529 | 0.762462 |
| 16S | OTU19 | L*T | Butner | UPRS   | High T | High T | -0.0304  | -0.4136  | 0.352806 |
| 16S | OTU19 | L*T | Butner | UPRS   | High T | Low T  | -0.58176 | -0.96698 | -0.19654 |
| 16S | OTU19 | L*T | Butner | UPRS   | Low T  | High T | -0.36898 | -0.78478 | 0.046808 |
| 16S | OTU19 | L*T | Butner | UPRS   | Low T  | Low T  | -0.92035 | -1.40674 | -0.43395 |
| 16S | OTU19 | L*T | UPRS   | UPRS   | High T | Low T  | -0.55136 | -0.93701 | -0.16571 |
| 16S | OTU20 | L   | Butner | UPRS   |        |        | 0.161594 | -0.32969 | 0.652873 |
| 16S | OTU20 | T   |        |        | High T | Low T  | 0.726864 | 0.316149 | 1.137579 |
| 16S | OTU20 | L*T | Butner | Butner | High T | Low T  | 1.582721 | 0.924732 | 2.24071  |
| 16S | OTU20 | L*T | Butner | UPRS   | High T | High T | 1.017451 | 0.440954 | 1.593948 |
| 16S | OTU20 | L*T | Butner | UPRS   | High T | Low T  | 0.888458 | 0.283044 | 1.493872 |
| 16S | OTU20 | L*T | Butner | UPRS   | Low T  | High T | -0.56527 | -1.23874 | 0.108196 |
| 16S | OTU20 | L*T | Butner | UPRS   | Low T  | Low T  | -0.69426 | -1.48776 | 0.09923  |

|     |       |     |        |        |        |        |          |          |          |
|-----|-------|-----|--------|--------|--------|--------|----------|----------|----------|
| 16S | OTU20 | L*T | UPRS   | UPRS   | High T | Low T  | -0.12899 | -0.74842 | 0.490438 |
| 16S | OTU21 | L   | Butner | UPRS   |        |        | 0.595246 | 0.193681 | 0.99681  |
| 16S | OTU21 | T   |        |        | High T | Low T  | -0.19404 | -0.53257 | 0.14449  |
| 16S | OTU21 | L*T | Butner | Butner | High T | Low T  | -0.20802 | -0.76056 | 0.344532 |
| 16S | OTU21 | L*T | Butner | UPRS   | High T | High T | 0.581269 | 0.098802 | 1.063735 |
| 16S | OTU21 | L*T | Butner | UPRS   | High T | Low T  | 0.401207 | -0.08941 | 0.891826 |
| 16S | OTU21 | L*T | Butner | UPRS   | Low T  | High T | 0.789284 | 0.231606 | 1.346962 |
| 16S | OTU21 | L*T | Butner | UPRS   | Low T  | Low T  | 0.609223 | -0.03356 | 1.252007 |
| 16S | OTU21 | L*T | UPRS   | UPRS   | High T | Low T  | -0.18006 | -0.67739 | 0.317263 |
| 16S | OTU22 | L   | Butner | UPRS   |        |        | 0.253488 | -1.72727 | 2.234248 |
| 16S | OTU22 | T   |        |        | High T | Low T  | -0.65043 | -2.33208 | 1.03122  |
| 16S | OTU22 | L*T | Butner | Butner | High T | Low T  | -2.05192 | -4.93724 | 0.833394 |
| 16S | OTU22 | L*T | Butner | UPRS   | High T | High T | -1.148   | -3.65745 | 1.36144  |
| 16S | OTU22 | L*T | Butner | UPRS   | High T | Low T  | -0.39694 | -2.954   | 2.160109 |
| 16S | OTU22 | L*T | Butner | UPRS   | Low T  | High T | 0.90392  | -1.73506 | 3.542897 |
| 16S | OTU22 | L*T | Butner | UPRS   | Low T  | Low T  | 1.65498  | -1.50562 | 4.815577 |
| 16S | OTU22 | L*T | UPRS   | UPRS   | High T | Low T  | 0.75106  | -1.65117 | 3.15329  |
| 16S | OTU23 | L   | Butner | UPRS   |        |        | 0.175683 | -0.25441 | 0.605774 |
| 16S | OTU23 | T   |        |        | High T | Low T  | -0.36426 | -0.73978 | 0.011262 |
| 16S | OTU23 | L*T | Butner | Butner | High T | Low T  | -0.75059 | -1.35765 | -0.14352 |
| 16S | OTU23 | L*T | Butner | UPRS   | High T | High T | -0.21064 | -0.74549 | 0.3242   |
| 16S | OTU23 | L*T | Butner | UPRS   | High T | Low T  | -0.18858 | -0.72825 | 0.351099 |
| 16S | OTU23 | L*T | Butner | UPRS   | Low T  | High T | 0.539943 | -0.06067 | 1.140558 |
| 16S | OTU23 | L*T | Butner | UPRS   | Low T  | Low T  | 0.56201  | -0.10676 | 1.230776 |
| 16S | OTU23 | L*T | UPRS   | UPRS   | High T | Low T  | 0.022067 | -0.5041  | 0.548238 |
| 16S | OTU24 | L   | Butner | UPRS   |        |        | -0.01012 | -0.29534 | 0.27509  |
| 16S | OTU24 | T   |        |        | High T | Low T  | -0.23008 | -0.46551 | 0.005344 |
| 16S | OTU24 | L*T | Butner | Butner | High T | Low T  | -0.38197 | -0.76595 | 0.002005 |
| 16S | OTU24 | L*T | Butner | UPRS   | High T | High T | -0.16202 | -0.50671 | 0.182677 |
| 16S | OTU24 | L*T | Butner | UPRS   | High T | Low T  | -0.24021 | -0.59397 | 0.113554 |
| 16S | OTU24 | L*T | Butner | UPRS   | Low T  | High T | 0.219959 | -0.16527 | 0.605184 |
| 16S | OTU24 | L*T | Butner | UPRS   | Low T  | Low T  | 0.141767 | -0.31343 | 0.596963 |
| 16S | OTU24 | L*T | UPRS   | UPRS   | High T | Low T  | -0.07819 | -0.43419 | 0.277806 |
| 16S | OTU25 | L   | Butner | UPRS   |        |        | 2.994735 | 1.2085   | 4.780969 |
| 16S | OTU25 | T   |        |        | High T | Low T  | 0.162786 | -1.38908 | 1.714657 |
| 16S | OTU25 | L*T | Butner | Butner | High T | Low T  | 1.536668 | -1.03913 | 4.112468 |
| 16S | OTU25 | L*T | Butner | UPRS   | High T | High T | 4.368617 | 2.590368 | 6.146866 |
| 16S | OTU25 | L*T | Butner | UPRS   | High T | Low T  | 3.157521 | 1.225334 | 5.089708 |
| 16S | OTU25 | L*T | Butner | UPRS   | Low T  | High T | 2.831949 | 0.09982  | 5.564077 |
| 16S | OTU25 | L*T | Butner | UPRS   | Low T  | Low T  | 1.620853 | -1.28728 | 4.52898  |
| 16S | OTU25 | L*T | UPRS   | UPRS   | High T | Low T  | -1.2111  | -3.06041 | 0.638221 |

|     |       |     |        |        |        |        |          |          |          |
|-----|-------|-----|--------|--------|--------|--------|----------|----------|----------|
| 16S | OTU26 | L   | Butner | UPRS   |        |        | -0.81935 | -1.71426 | 0.075561 |
| 16S | OTU26 | T   |        |        | High T | Low T  | 0.18204  | -0.55642 | 0.920503 |
| 16S | OTU26 | L*T | Butner | Butner | High T | Low T  | 1.428316 | 0.241023 | 2.615608 |
| 16S | OTU26 | L*T | Butner | UPRS   | High T | High T | 0.426928 | -0.63108 | 1.484937 |
| 16S | OTU26 | L*T | Butner | UPRS   | High T | Low T  | -0.63731 | -1.74642 | 0.471805 |
| 16S | OTU26 | L*T | Butner | UPRS   | Low T  | High T | -1.00139 | -2.21062 | 0.207847 |
| 16S | OTU26 | L*T | Butner | UPRS   | Low T  | Low T  | -2.06562 | -3.53337 | -0.59788 |
| 16S | OTU26 | L*T | UPRS   | UPRS   | High T | Low T  | -1.06423 | -2.22739 | 0.09892  |
| 16S | OTU27 | L   | Butner | UPRS   |        |        | -0.39808 | -1.51326 | 0.717099 |
| 16S | OTU27 | T   |        |        | High T | Low T  | -1.28506 | -2.32566 | -0.24446 |
| 16S | OTU27 | L*T | Butner | Butner | High T | Low T  | -2.87106 | -4.569   | -1.17312 |
| 16S | OTU27 | L*T | Butner | UPRS   | High T | High T | -1.98408 | -3.32103 | -0.64714 |
| 16S | OTU27 | L*T | Butner | UPRS   | High T | Low T  | -1.68314 | -3.04704 | -0.31923 |
| 16S | OTU27 | L*T | Butner | UPRS   | Low T  | High T | 0.88698  | -0.78416 | 2.55812  |
| 16S | OTU27 | L*T | Butner | UPRS   | Low T  | Low T  | 1.187925 | -0.62838 | 3.004234 |
| 16S | OTU27 | L*T | UPRS   | UPRS   | High T | Low T  | 0.300945 | -1.07086 | 1.672749 |
| 16S | OTU28 | L   | Butner | UPRS   |        |        | 0.00756  | -0.40131 | 0.416429 |
| 16S | OTU28 | T   |        |        | High T | Low T  | 0.085358 | -0.26209 | 0.43281  |
| 16S | OTU28 | L*T | Butner | Butner | High T | Low T  | 0.373802 | -0.19853 | 0.946131 |
| 16S | OTU28 | L*T | Butner | UPRS   | High T | High T | 0.296004 | -0.21449 | 0.806496 |
| 16S | OTU28 | L*T | Butner | UPRS   | High T | Low T  | 0.092919 | -0.41655 | 0.602383 |
| 16S | OTU28 | L*T | Butner | UPRS   | Low T  | High T | -0.0778  | -0.64015 | 0.484554 |
| 16S | OTU28 | L*T | Butner | UPRS   | Low T  | Low T  | -0.28088 | -0.93809 | 0.376321 |
| 16S | OTU28 | L*T | UPRS   | UPRS   | High T | Low T  | -0.20309 | -0.72468 | 0.318505 |
| 16S | OTU29 | L   | Butner | UPRS   |        |        | -0.37172 | -0.69242 | -0.05101 |
| 16S | OTU29 | T   |        |        | High T | Low T  | -0.13976 | -0.40838 | 0.128861 |
| 16S | OTU29 | L*T | Butner | Butner | High T | Low T  | -0.02302 | -0.45844 | 0.4124   |
| 16S | OTU29 | L*T | Butner | UPRS   | High T | High T | -0.25498 | -0.63727 | 0.127312 |
| 16S | OTU29 | L*T | Butner | UPRS   | High T | Low T  | -0.51147 | -0.9034  | -0.11955 |
| 16S | OTU29 | L*T | Butner | UPRS   | Low T  | High T | -0.23196 | -0.67514 | 0.211228 |
| 16S | OTU29 | L*T | Butner | UPRS   | Low T  | Low T  | -0.48845 | -0.9953  | 0.018394 |
| 16S | OTU29 | L*T | UPRS   | UPRS   | High T | Low T  | -0.25649 | -0.64644 | 0.133447 |
| 16S | OTU30 | L   | Butner | UPRS   |        |        | -0.25487 | -0.60548 | 0.095745 |
| 16S | OTU30 | T   |        |        | High T | Low T  | 0.04452  | -0.25143 | 0.340468 |
| 16S | OTU30 | L*T | Butner | Butner | High T | Low T  | 0.289933 | -0.18995 | 0.769815 |
| 16S | OTU30 | L*T | Butner | UPRS   | High T | High T | -0.00946 | -0.44157 | 0.422657 |
| 16S | OTU30 | L*T | Butner | UPRS   | High T | Low T  | -0.21035 | -0.64865 | 0.227949 |
| 16S | OTU30 | L*T | Butner | UPRS   | Low T  | High T | -0.29939 | -0.77785 | 0.179072 |
| 16S | OTU30 | L*T | Butner | UPRS   | Low T  | Low T  | -0.50028 | -1.05192 | 0.051359 |
| 16S | OTU30 | L*T | UPRS   | UPRS   | High T | Low T  | -0.20089 | -0.63684 | 0.235058 |
| 16S | OTU31 | L   | Butner | UPRS   |        |        | 0.470895 | -1.26715 | 2.208938 |

|     |       |     |        |        |        |        |          |          |          |
|-----|-------|-----|--------|--------|--------|--------|----------|----------|----------|
| 16S | OTU31 | T   |        |        | High T | Low T  | 0.364243 | -1.05913 | 1.787618 |
| 16S | OTU31 | L*T | Butner | Butner | High T | Low T  | 1.29794  | -1.12189 | 3.717768 |
| 16S | OTU31 | L*T | Butner | UPRS   | High T | High T | 1.404593 | -0.58442 | 3.393604 |
| 16S | OTU31 | L*T | Butner | UPRS   | High T | Low T  | 0.835138 | -1.23265 | 2.902926 |
| 16S | OTU31 | L*T | Butner | UPRS   | Low T  | High T | 0.106652 | -2.30536 | 2.518669 |
| 16S | OTU31 | L*T | Butner | UPRS   | Low T  | Low T  | -0.4628  | -3.41513 | 2.489531 |
| 16S | OTU31 | L*T | UPRS   | UPRS   | High T | Low T  | -0.56945 | -2.76656 | 1.627653 |
| 16S | OTU32 | L   | Butner | UPRS   |        |        | -0.13764 | -0.58288 | 0.307599 |
| 16S | OTU32 | T   |        |        | High T | Low T  | 0.042631 | -0.3293  | 0.414567 |
| 16S | OTU32 | L*T | Butner | Butner | High T | Low T  | 0.365279 | -0.23176 | 0.962317 |
| 16S | OTU32 | L*T | Butner | UPRS   | High T | High T | 0.185009 | -0.34183 | 0.711844 |
| 16S | OTU32 | L*T | Butner | UPRS   | High T | Low T  | -0.09501 | -0.63714 | 0.44713  |
| 16S | OTU32 | L*T | Butner | UPRS   | Low T  | High T | -0.18027 | -0.79609 | 0.435548 |
| 16S | OTU32 | L*T | Butner | UPRS   | Low T  | Low T  | -0.46029 | -1.16383 | 0.243255 |
| 16S | OTU32 | L*T | UPRS   | UPRS   | High T | Low T  | -0.28002 | -0.82432 | 0.264292 |
| 16S | OTU33 | L   | Butner | UPRS   |        |        | -0.46158 | -0.85098 | -0.07218 |
| 16S | OTU33 | T   |        |        | High T | Low T  | 0.075955 | -0.25296 | 0.404871 |
| 16S | OTU33 | L*T | Butner | Butner | High T | Low T  | 0.443623 | -0.10068 | 0.987929 |
| 16S | OTU33 | L*T | Butner | UPRS   | High T | High T | -0.09391 | -0.5778  | 0.38998  |
| 16S | OTU33 | L*T | Butner | UPRS   | High T | Low T  | -0.38562 | -0.87207 | 0.100821 |
| 16S | OTU33 | L*T | Butner | UPRS   | Low T  | High T | -0.53753 | -1.06951 | -0.00556 |
| 16S | OTU33 | L*T | Butner | UPRS   | Low T  | Low T  | -0.82925 | -1.45446 | -0.20404 |
| 16S | OTU33 | L*T | UPRS   | UPRS   | High T | Low T  | -0.29171 | -0.78353 | 0.200101 |
| 16S | OTU34 | L   | Butner | UPRS   |        |        | -0.26659 | -0.69393 | 0.160754 |
| 16S | OTU34 | T   |        |        | High T | Low T  | 0.098709 | -0.2559  | 0.453321 |
| 16S | OTU34 | L*T | Butner | Butner | High T | Low T  | -0.2538  | -0.8428  | 0.33519  |
| 16S | OTU34 | L*T | Butner | UPRS   | High T | High T | -0.6191  | -1.13068 | -0.10752 |
| 16S | OTU34 | L*T | Butner | UPRS   | High T | Low T  | -0.16788 | -0.69153 | 0.355775 |
| 16S | OTU34 | L*T | Butner | UPRS   | Low T  | High T | -0.3653  | -0.95055 | 0.219963 |
| 16S | OTU34 | L*T | Butner | UPRS   | Low T  | Low T  | 0.085926 | -0.60104 | 0.772897 |
| 16S | OTU34 | L*T | UPRS   | UPRS   | High T | Low T  | 0.451222 | -0.07126 | 0.9737   |
| 16S | OTU35 | L   | Butner | UPRS   |        |        | -0.07018 | -0.42131 | 0.280949 |
| 16S | OTU35 | T   |        |        | High T | Low T  | -0.00724 | -0.30227 | 0.287786 |
| 16S | OTU35 | L*T | Butner | Butner | High T | Low T  | 0.028976 | -0.45768 | 0.515634 |
| 16S | OTU35 | L*T | Butner | UPRS   | High T | High T | -0.03396 | -0.45914 | 0.391224 |
| 16S | OTU35 | L*T | Butner | UPRS   | High T | Low T  | -0.07742 | -0.50766 | 0.352812 |
| 16S | OTU35 | L*T | Butner | UPRS   | Low T  | High T | -0.06293 | -0.54828 | 0.422415 |
| 16S | OTU35 | L*T | Butner | UPRS   | Low T  | Low T  | -0.1064  | -0.67272 | 0.459927 |
| 16S | OTU35 | L*T | UPRS   | UPRS   | High T | Low T  | -0.04346 | -0.48184 | 0.39491  |
| 16S | OTU36 | L   | Butner | UPRS   |        |        | 4.754671 | 3.128714 | 6.380629 |
| 16S | OTU36 | T   |        |        | High T | Low T  | 0.33761  | -1.12145 | 1.79667  |

|     |       |     |        |        |        |        |          |          |          |
|-----|-------|-----|--------|--------|--------|--------|----------|----------|----------|
| 16S | OTU36 | L*T | Butner | Butner | High T | Low T  | -0.81066 | -3.49967 | 1.878346 |
| 16S | OTU36 | L*T | Butner | UPRS   | High T | High T | 3.6064   | 1.38034  | 5.832461 |
| 16S | OTU36 | L*T | Butner | UPRS   | High T | Low T  | 5.092282 | 3.037656 | 7.146907 |
| 16S | OTU36 | L*T | Butner | UPRS   | Low T  | High T | 4.417061 | 2.109747 | 6.724375 |
| 16S | OTU36 | L*T | Butner | UPRS   | Low T  | Low T  | 5.902942 | 3.069585 | 8.736299 |
| 16S | OTU36 | L*T | UPRS   | UPRS   | High T | Low T  | 1.485881 | -0.6873  | 3.659067 |
| 16S | OTU37 | L   | Butner | UPRS   |        |        | 0.102183 | -0.27002 | 0.474388 |
| 16S | OTU37 | T   |        |        | High T | Low T  | -0.05373 | -0.37353 | 0.266079 |
| 16S | OTU37 | L*T | Butner | Butner | High T | Low T  | -0.30054 | -0.81227 | 0.211192 |
| 16S | OTU37 | L*T | Butner | UPRS   | High T | High T | -0.14463 | -0.60723 | 0.317973 |
| 16S | OTU37 | L*T | Butner | UPRS   | High T | Low T  | 0.048456 | -0.41727 | 0.514187 |
| 16S | OTU37 | L*T | Butner | UPRS   | Low T  | High T | 0.15591  | -0.3586  | 0.670419 |
| 16S | OTU37 | L*T | Butner | UPRS   | Low T  | Low T  | 0.348994 | -0.23258 | 0.930571 |
| 16S | OTU37 | L*T | UPRS   | UPRS   | High T | Low T  | 0.193084 | -0.27365 | 0.659819 |
| 16S | OTU38 | L   | Butner | UPRS   |        |        | 0.122596 | -0.68778 | 0.932973 |
| 16S | OTU38 | T   |        |        | High T | Low T  | 0.852965 | 0.14892  | 1.55701  |
| 16S | OTU38 | L*T | Butner | Butner | High T | Low T  | 2.050018 | 0.892303 | 3.207733 |
| 16S | OTU38 | L*T | Butner | UPRS   | High T | High T | 1.319649 | 0.362024 | 2.277274 |
| 16S | OTU38 | L*T | Butner | UPRS   | High T | Low T  | 0.975561 | -0.00336 | 1.954485 |
| 16S | OTU38 | L*T | Butner | UPRS   | Low T  | High T | -0.73037 | -1.89075 | 0.430013 |
| 16S | OTU38 | L*T | Butner | UPRS   | Low T  | Low T  | -1.07446 | -2.43185 | 0.282935 |
| 16S | OTU38 | L*T | UPRS   | UPRS   | High T | Low T  | -0.34409 | -1.39156 | 0.70338  |
| 16S | OTU39 | L   | Butner | UPRS   |        |        | 0.221751 | -0.48897 | 0.932469 |
| 16S | OTU39 | T   |        |        | High T | Low T  | 0.315438 | -0.27997 | 0.910845 |
| 16S | OTU39 | L*T | Butner | Butner | High T | Low T  | 0.809539 | -0.17231 | 1.791384 |
| 16S | OTU39 | L*T | Butner | UPRS   | High T | High T | 0.715852 | -0.15155 | 1.583256 |
| 16S | OTU39 | L*T | Butner | UPRS   | High T | Low T  | 0.537189 | -0.34708 | 1.421458 |
| 16S | OTU39 | L*T | Butner | UPRS   | Low T  | High T | -0.09369 | -1.06184 | 0.87447  |
| 16S | OTU39 | L*T | Butner | UPRS   | Low T  | Low T  | -0.27235 | -1.40846 | 0.863764 |
| 16S | OTU39 | L*T | UPRS   | UPRS   | High T | Low T  | -0.17866 | -1.06065 | 0.703325 |
| 16S | OTU40 | L   | Butner | UPRS   |        |        | -0.23812 | -0.80838 | 0.33214  |
| 16S | OTU40 | T   |        |        | High T | Low T  | -0.27788 | -0.75774 | 0.201987 |
| 16S | OTU40 | L*T | Butner | Butner | High T | Low T  | -0.36635 | -1.16477 | 0.432061 |
| 16S | OTU40 | L*T | Butner | UPRS   | High T | High T | -0.3266  | -1.04598 | 0.392793 |
| 16S | OTU40 | L*T | Butner | UPRS   | High T | Low T  | -0.516   | -1.23134 | 0.199336 |
| 16S | OTU40 | L*T | Butner | UPRS   | Low T  | High T | 0.039757 | -0.73434 | 0.813859 |
| 16S | OTU40 | L*T | Butner | UPRS   | Low T  | Low T  | -0.14965 | -1.07709 | 0.777794 |
| 16S | OTU40 | L*T | UPRS   | UPRS   | High T | Low T  | -0.18941 | -0.93126 | 0.552451 |
| 16S | OTU41 | L   | Butner | UPRS   |        |        | -0.12949 | -0.47685 | 0.217872 |
| 16S | OTU41 | T   |        |        | High T | Low T  | -0.21854 | -0.51294 | 0.075846 |
| 16S | OTU41 | L*T | Butner | Butner | High T | Low T  | 0.005673 | -0.47447 | 0.485818 |



|     |       |     |        |        |        |        |          |          |          |
|-----|-------|-----|--------|--------|--------|--------|----------|----------|----------|
| 16S | OTU41 | L*T | Butner | UPRS   | High T | High T | 0.09473  | -0.32313 | 0.512592 |
| 16S | OTU41 | L*T | Butner | UPRS   | High T | Low T  | -0.34803 | -0.77132 | 0.075255 |
| 16S | OTU41 | L*T | Butner | UPRS   | Low T  | High T | 0.089057 | -0.3962  | 0.574317 |
| 16S | OTU41 | L*T | Butner | UPRS   | Low T  | Low T  | -0.35371 | -0.90726 | 0.199853 |
| 16S | OTU41 | L*T | UPRS   | UPRS   | High T | Low T  | -0.44276 | -0.86998 | -0.01555 |
| 16S | OTU42 | L   | Butner | UPRS   |        |        | -0.01477 | -0.53537 | 0.505824 |
| 16S | OTU42 | T   |        |        | High T | Low T  | -0.068   | -0.50403 | 0.368028 |
| 16S | OTU42 | L*T | Butner | Butner | High T | Low T  | 0.377817 | -0.33209 | 1.087725 |
| 16S | OTU42 | L*T | Butner | UPRS   | High T | High T | 0.431048 | -0.17155 | 1.033649 |
| 16S | OTU42 | L*T | Butner | UPRS   | High T | Low T  | -0.08277 | -0.70667 | 0.541119 |
| 16S | OTU42 | L*T | Butner | UPRS   | Low T  | High T | 0.053231 | -0.67687 | 0.783327 |
| 16S | OTU42 | L*T | Butner | UPRS   | Low T  | Low T  | -0.46059 | -1.30026 | 0.379075 |
| 16S | OTU42 | L*T | UPRS   | UPRS   | High T | Low T  | -0.51382 | -1.14818 | 0.120532 |
| 16S | OTU43 | L   | Butner | UPRS   |        |        | -1.0559  | -1.54901 | -0.5628  |
| 16S | OTU43 | T   |        |        | High T | Low T  | 0.241024 | -0.17604 | 0.658088 |
| 16S | OTU43 | L*T | Butner | Butner | High T | Low T  | 0.672524 | -0.00683 | 1.351882 |
| 16S | OTU43 | L*T | Butner | UPRS   | High T | High T | -0.6244  | -1.23996 | -0.00885 |
| 16S | OTU43 | L*T | Butner | UPRS   | High T | Low T  | -0.81488 | -1.4322  | -0.19755 |
| 16S | OTU43 | L*T | Butner | UPRS   | Low T  | High T | -1.29693 | -1.97005 | -0.6238  |
| 16S | OTU43 | L*T | Butner | UPRS   | Low T  | Low T  | -1.4874  | -2.27332 | -0.70149 |
| 16S | OTU43 | L*T | UPRS   | UPRS   | High T | Low T  | -0.19048 | -0.82025 | 0.439303 |
| 16S | OTU44 | L   | Butner | UPRS   |        |        | 0.224226 | -0.22064 | 0.669089 |
| 16S | OTU44 | T   |        |        | High T | Low T  | 0.118095 | -0.25043 | 0.486618 |
| 16S | OTU44 | L*T | Butner | Butner | High T | Low T  | 0.420422 | -0.19212 | 1.03296  |
| 16S | OTU44 | L*T | Butner | UPRS   | High T | High T | 0.526552 | 0.002373 | 1.050732 |
| 16S | OTU44 | L*T | Butner | UPRS   | High T | Low T  | 0.342321 | -0.19819 | 0.882834 |
| 16S | OTU44 | L*T | Butner | UPRS   | Low T  | High T | 0.106131 | -0.50646 | 0.718725 |
| 16S | OTU44 | L*T | Butner | UPRS   | Low T  | Low T  | -0.0781  | -0.80835 | 0.652145 |
| 16S | OTU44 | L*T | UPRS   | UPRS   | High T | Low T  | -0.18423 | -0.73978 | 0.371316 |
| 16S | OTU45 | L   | Butner | UPRS   |        |        | -1.25485 | -2.05785 | -0.45186 |
| 16S | OTU45 | T   |        |        | High T | Low T  | 0.186839 | -0.48396 | 0.857641 |
| 16S | OTU45 | L*T | Butner | Butner | High T | Low T  | 1.394643 | 0.313573 | 2.475714 |
| 16S | OTU45 | L*T | Butner | UPRS   | High T | High T | -0.04705 | -0.96338 | 0.869282 |
| 16S | OTU45 | L*T | Butner | UPRS   | High T | Low T  | -1.06801 | -2.03665 | -0.09938 |
| 16S | OTU45 | L*T | Butner | UPRS   | Low T  | High T | -1.44169 | -2.56031 | -0.32308 |
| 16S | OTU45 | L*T | Butner | UPRS   | Low T  | Low T  | -2.46266 | -3.76001 | -1.1653  |
| 16S | OTU45 | L*T | UPRS   | UPRS   | High T | Low T  | -1.02097 | -2.00301 | -0.03892 |
| 16S | OTU46 | L   | Butner | UPRS   |        |        | -0.0598  | -0.955   | 0.835407 |
| 16S | OTU46 | T   |        |        | High T | Low T  | -0.40845 | -1.18701 | 0.370114 |
| 16S | OTU46 | L*T | Butner | Butner | High T | Low T  | -0.21946 | -1.54488 | 1.105969 |
| 16S | OTU46 | L*T | Butner | UPRS   | High T | High T | 0.129195 | -1.01222 | 1.270612 |

|     |       |     |        |        |        |        |          |          |          |
|-----|-------|-----|--------|--------|--------|--------|----------|----------|----------|
| 16S | OTU46 | L*T | Butner | UPRS   | High T | Low T  | -0.46824 | -1.56865 | 0.632165 |
| 16S | OTU46 | L*T | Butner | UPRS   | Low T  | High T | 0.348651 | -0.91792 | 1.615218 |
| 16S | OTU46 | L*T | Butner | UPRS   | Low T  | Low T  | -0.24879 | -1.73764 | 1.240071 |
| 16S | OTU46 | L*T | UPRS   | UPRS   | High T | Low T  | -0.59744 | -1.76889 | 0.574021 |
| 16S | OTU47 | L   | Butner | UPRS   |        |        | -0.57753 | -1.04169 | -0.11336 |
| 16S | OTU47 | T   |        |        | High T | Low T  | -0.10235 | -0.48798 | 0.283273 |
| 16S | OTU47 | L*T | Butner | Butner | High T | Low T  | -0.08119 | -0.71739 | 0.555009 |
| 16S | OTU47 | L*T | Butner | UPRS   | High T | High T | -0.55636 | -1.11056 | -0.00217 |
| 16S | OTU47 | L*T | Butner | UPRS   | High T | Low T  | -0.67988 | -1.24977 | -0.10999 |
| 16S | OTU47 | L*T | Butner | UPRS   | Low T  | High T | -0.47517 | -1.11042 | 0.160071 |
| 16S | OTU47 | L*T | Butner | UPRS   | Low T  | Low T  | -0.59869 | -1.35667 | 0.159285 |
| 16S | OTU47 | L*T | UPRS   | UPRS   | High T | Low T  | -0.12352 | -0.70955 | 0.462514 |
| 16S | OTU48 | L   | Butner | UPRS   |        |        | -0.67848 | -1.22562 | -0.13134 |
| 16S | OTU48 | T   |        |        | High T | Low T  | -0.18753 | -0.64511 | 0.270056 |
| 16S | OTU48 | L*T | Butner | Butner | High T | Low T  | -0.13133 | -0.8867  | 0.624045 |
| 16S | OTU48 | L*T | Butner | UPRS   | High T | High T | -0.62228 | -1.32144 | 0.076872 |
| 16S | OTU48 | L*T | Butner | UPRS   | High T | Low T  | -0.86601 | -1.56579 | -0.16623 |
| 16S | OTU48 | L*T | Butner | UPRS   | Low T  | High T | -0.49096 | -1.21746 | 0.23554  |
| 16S | OTU48 | L*T | Butner | UPRS   | Low T  | Low T  | -0.73468 | -1.60043 | 0.131067 |
| 16S | OTU48 | L*T | UPRS   | UPRS   | High T | Low T  | -0.24372 | -0.94214 | 0.454694 |
| 16S | OTU49 | L   | Butner | UPRS   |        |        | 0.284516 | -0.28964 | 0.858668 |
| 16S | OTU49 | T   |        |        | High T | Low T  | -0.02318 | -0.52838 | 0.482018 |
| 16S | OTU49 | L*T | Butner | Butner | High T | Low T  | -0.16168 | -0.98423 | 0.660882 |
| 16S | OTU49 | L*T | Butner | UPRS   | High T | High T | 0.146023 | -0.55938 | 0.851423 |
| 16S | OTU49 | L*T | Butner | UPRS   | High T | Low T  | 0.261333 | -0.45502 | 0.97769  |
| 16S | OTU49 | L*T | Butner | UPRS   | Low T  | High T | 0.307698 | -0.5026  | 1.118    |
| 16S | OTU49 | L*T | Butner | UPRS   | Low T  | Low T  | 0.423008 | -0.47965 | 1.325664 |
| 16S | OTU49 | L*T | UPRS   | UPRS   | High T | Low T  | 0.115309 | -0.58249 | 0.813113 |
| 16S | OTU50 | L   | Butner | UPRS   |        |        | -0.7513  | -1.19069 | -0.31191 |
| 16S | OTU50 | T   |        |        | High T | Low T  | -0.05685 | -0.42867 | 0.314972 |
| 16S | OTU50 | L*T | Butner | Butner | High T | Low T  | 0.291026 | -0.30972 | 0.891776 |
| 16S | OTU50 | L*T | Butner | UPRS   | High T | High T | -0.40342 | -0.94136 | 0.134512 |
| 16S | OTU50 | L*T | Butner | UPRS   | High T | Low T  | -0.80815 | -1.35484 | -0.26146 |
| 16S | OTU50 | L*T | Butner | UPRS   | Low T  | High T | -0.69445 | -1.29757 | -0.09133 |
| 16S | OTU50 | L*T | Butner | UPRS   | Low T  | Low T  | -1.09917 | -1.78938 | -0.40896 |
| 16S | OTU50 | L*T | UPRS   | UPRS   | High T | Low T  | -0.40472 | -0.94809 | 0.138642 |
| ITS | OTU01 | L   | Butner | UPRS   |        |        | 3.190268 | 2.21687  | 4.163666 |
| ITS | OTU01 | T   |        |        | High T | Low T  | 1.614199 | 0.70683  | 2.521568 |
| ITS | OTU01 | L*T | Butner | Butner | High T | Low T  | 2.294758 | 0.794255 | 3.795261 |
| ITS | OTU01 | L*T | Butner | UPRS   | High T | High T | 3.870827 | 2.515106 | 5.226547 |
| ITS | OTU01 | L*T | Butner | UPRS   | High T | Low T  | 4.804467 | 3.487353 | 6.121581 |

|     |       |     |        |        |        |        |          |          |          |
|-----|-------|-----|--------|--------|--------|--------|----------|----------|----------|
| ITS | OTU01 | L*T | Butner | UPRS   | Low T  | High T | 1.576069 | 0.231876 | 2.920262 |
| ITS | OTU01 | L*T | Butner | UPRS   | Low T  | Low T  | 2.509709 | 1.025067 | 3.994351 |
| ITS | OTU01 | L*T | UPRS   | UPRS   | High T | Low T  | 0.93364  | -0.30824 | 2.175519 |
| ITS | OTU02 | L   | Butner | UPRS   |        |        | 0.721124 | -1.742   | 3.184249 |
| ITS | OTU02 | T   |        |        | High T | Low T  | -8.32526 | -10.336  | -6.31454 |
| ITS | OTU02 | L*T | Butner | Butner | High T | Low T  | -9.76246 | -12.6781 | -6.8468  |
| ITS | OTU02 | L*T | Butner | UPRS   | High T | High T | -0.71608 | -3.86856 | 2.436411 |
| ITS | OTU02 | L*T | Butner | UPRS   | High T | Low T  | -7.60414 | -10.9713 | -4.23696 |
| ITS | OTU02 | L*T | Butner | UPRS   | Low T  | High T | 9.046387 | 6.06611  | 12.02666 |
| ITS | OTU02 | L*T | Butner | UPRS   | Low T  | Low T  | 2.158324 | -1.27239 | 5.589036 |
| ITS | OTU02 | L*T | UPRS   | UPRS   | High T | Low T  | -6.88806 | -9.91443 | -3.8617  |
| ITS | OTU03 | L   | Butner | UPRS   |        |        | -3.33972 | -5.88155 | -0.7979  |
| ITS | OTU03 | T   |        |        | High T | Low T  | -4.99372 | -7.11481 | -2.87263 |
| ITS | OTU03 | L*T | Butner | Butner | High T | Low T  | -2.51384 | -5.97635 | 0.948671 |
| ITS | OTU03 | L*T | Butner | UPRS   | High T | High T | -0.85985 | -4.11629 | 2.396602 |
| ITS | OTU03 | L*T | Butner | UPRS   | High T | Low T  | -8.33344 | -12.2044 | -4.46252 |
| ITS | OTU03 | L*T | Butner | UPRS   | Low T  | High T | 1.653993 | -0.97959 | 4.287574 |
| ITS | OTU03 | L*T | Butner | UPRS   | Low T  | Low T  | -5.8196  | -9.99468 | -1.64453 |
| ITS | OTU03 | L*T | UPRS   | UPRS   | High T | Low T  | -7.4736  | -10.9554 | -3.99178 |
| ITS | OTU04 | L   | Butner | UPRS   |        |        | -1.75061 | -3.12578 | -0.37544 |
| ITS | OTU04 | T   |        |        | High T | Low T  | 6.245067 | 4.926054 | 7.564079 |
| ITS | OTU04 | L*T | Butner | Butner | High T | Low T  | 2.249703 | -0.02545 | 4.524854 |
| ITS | OTU04 | L*T | Butner | UPRS   | High T | High T | -5.74598 | -7.65838 | -3.83358 |
| ITS | OTU04 | L*T | Butner | UPRS   | High T | Low T  | 4.494453 | 2.536418 | 6.452489 |
| ITS | OTU04 | L*T | Butner | UPRS   | Low T  | High T | -7.99568 | -9.84713 | -6.14423 |
| ITS | OTU04 | L*T | Butner | UPRS   | Low T  | Low T  | 2.244751 | -0.10602 | 4.595518 |
| ITS | OTU04 | L*T | UPRS   | UPRS   | High T | Low T  | 10.24043 | 8.315728 | 12.16513 |
| ITS | OTU05 | L   | Butner | UPRS   |        |        | 6.239988 | 5.013925 | 7.466052 |
| ITS | OTU05 | T   |        |        | High T | Low T  | 3.960179 | 2.862428 | 5.05793  |
| ITS | OTU05 | L*T | Butner | Butner | High T | Low T  | 2.048806 | 0.354474 | 3.743139 |
| ITS | OTU05 | L*T | Butner | UPRS   | High T | High T | 4.328615 | 2.939434 | 5.717796 |
| ITS | OTU05 | L*T | Butner | UPRS   | High T | Low T  | 10.20017 | 8.372299 | 12.02804 |
| ITS | OTU05 | L*T | Butner | UPRS   | Low T  | High T | 2.279809 | 0.839158 | 3.72046  |
| ITS | OTU05 | L*T | Butner | UPRS   | Low T  | Low T  | 8.151361 | 5.960885 | 10.34184 |
| ITS | OTU05 | L*T | UPRS   | UPRS   | High T | Low T  | 5.871552 | 4.065756 | 7.677348 |
| ITS | OTU06 | L   | Butner | UPRS   |        |        | 1.685441 | 0.530784 | 2.840098 |
| ITS | OTU06 | T   |        |        | High T | Low T  | 6.252885 | 5.188097 | 7.317673 |
| ITS | OTU06 | L*T | Butner | Butner | High T | Low T  | 2.463677 | 0.844516 | 4.082837 |
| ITS | OTU06 | L*T | Butner | UPRS   | High T | High T | -2.10377 | -3.42281 | -0.78472 |
| ITS | OTU06 | L*T | Butner | UPRS   | High T | Low T  | 7.938326 | 6.197595 | 9.679058 |
| ITS | OTU06 | L*T | Butner | UPRS   | Low T  | High T | -4.56744 | -5.94725 | -3.18764 |

|     |       |     |        |        |        |        |          |          |          |
|-----|-------|-----|--------|--------|--------|--------|----------|----------|----------|
| ITS | OTU06 | L*T | Butner | UPRS   | Low T  | Low T  | 5.47465  | 3.385467 | 7.563833 |
| ITS | OTU06 | L*T | UPRS   | UPRS   | High T | Low T  | 10.04209 | 8.28597  | 11.79822 |
| ITS | OTU07 | L   | Butner | UPRS   |        |        | -8.39264 | -10.9998 | -5.78543 |
| ITS | OTU07 | T   |        |        | High T | Low T  | -1.28569 | -3.46778 | 0.896395 |
| ITS | OTU07 | L*T | Butner | Butner | High T | Low T  | -0.35017 | -4.02308 | 3.322753 |
| ITS | OTU07 | L*T | Butner | UPRS   | High T | High T | -7.45712 | -10.4832 | -4.43104 |
| ITS | OTU07 | L*T | Butner | UPRS   | High T | Low T  | -9.67833 | -12.7766 | -6.58006 |
| ITS | OTU07 | L*T | Butner | UPRS   | Low T  | High T | -7.10695 | -10.7837 | -3.43016 |
| ITS | OTU07 | L*T | Butner | UPRS   | Low T  | Low T  | -9.32816 | -13.4499 | -5.2064  |
| ITS | OTU07 | L*T | UPRS   | UPRS   | High T | Low T  | -2.22122 | -5.15101 | 0.708577 |
| ITS | OTU08 | L   | Butner | UPRS   |        |        | -4.57146 | -7.53106 | -1.61187 |
| ITS | OTU08 | T   |        |        | High T | Low T  | 1.388788 | -1.48384 | 4.261414 |
| ITS | OTU08 | L*T | Butner | Butner | High T | Low T  | -5.1964  | -9.72607 | -0.66674 |
| ITS | OTU08 | L*T | Butner | UPRS   | High T | High T | -11.1567 | -14.8163 | -7.49704 |
| ITS | OTU08 | L*T | Butner | UPRS   | High T | Low T  | -3.18267 | -7.00475 | 0.639396 |
| ITS | OTU08 | L*T | Butner | UPRS   | Low T  | High T | -5.96025 | -10.3664 | -1.5541  |
| ITS | OTU08 | L*T | Butner | UPRS   | Low T  | Low T  | 2.013729 | -2.0123  | 6.039756 |
| ITS | OTU08 | L*T | UPRS   | UPRS   | High T | Low T  | 7.97398  | 5.133324 | 10.81464 |
| ITS | OTU10 | L   | Butner | UPRS   |        |        | 1.835527 | -0.14361 | 3.814665 |
| ITS | OTU10 | T   |        |        | High T | Low T  | -2.74004 | -4.38055 | -1.09952 |
| ITS | OTU10 | L*T | Butner | Butner | High T | Low T  | -5.13398 | -8.03758 | -2.23038 |
| ITS | OTU10 | L*T | Butner | UPRS   | High T | High T | -0.55841 | -2.93533 | 1.818501 |
| ITS | OTU10 | L*T | Butner | UPRS   | High T | Low T  | -0.90451 | -3.39765 | 1.588625 |
| ITS | OTU10 | L*T | Butner | UPRS   | Low T  | High T | 4.575565 | 1.929657 | 7.221474 |
| ITS | OTU10 | L*T | Butner | UPRS   | Low T  | Low T  | 4.229469 | 1.024188 | 7.43475  |
| ITS | OTU10 | L*T | UPRS   | UPRS   | High T | Low T  | -0.3461  | -2.59138 | 1.899183 |
| ITS | OTU11 | L   | Butner | UPRS   |        |        | -2.18017 | -6.55924 | 2.198904 |
| ITS | OTU11 | T   |        |        | High T | Low T  | 0.489002 | -1.68644 | 2.664445 |
| ITS | OTU11 | L*T | Butner | Butner | High T | Low T  | 2.944639 | -1.63294 | 7.522221 |
| ITS | OTU11 | L*T | Butner | UPRS   | High T | High T | 0.275467 | -2.91734 | 3.468272 |
| ITS | OTU11 | L*T | Butner | UPRS   | High T | Low T  | -1.69117 | -6.77698 | 3.394641 |
| ITS | OTU11 | L*T | Butner | UPRS   | Low T  | High T | -2.66917 | -7.35449 | 2.016148 |
| ITS | OTU11 | L*T | Butner | UPRS   | Low T  | Low T  | -4.63581 | -12.6185 | 3.346893 |
| ITS | OTU11 | L*T | UPRS   | UPRS   | High T | Low T  | -1.96663 | -6.87334 | 2.940072 |
| ITS | OTU12 | L   | Butner | UPRS   |        |        | 4.927888 | 3.761621 | 6.094156 |
| ITS | OTU12 | T   |        |        | High T | Low T  | 4.013558 | 2.953139 | 5.073977 |
| ITS | OTU12 | L*T | Butner | Butner | High T | Low T  | 1.619959 | -0.14078 | 3.380698 |
| ITS | OTU12 | L*T | Butner | UPRS   | High T | High T | 2.53429  | 1.031304 | 4.037275 |
| ITS | OTU12 | L*T | Butner | UPRS   | High T | Low T  | 8.941447 | 7.213818 | 10.66907 |
| ITS | OTU12 | L*T | Butner | UPRS   | Low T  | High T | 0.91433  | -0.49444 | 2.323102 |
| ITS | OTU12 | L*T | Butner | UPRS   | Low T  | Low T  | 7.321487 | 5.195991 | 9.446983 |

|     |       |     |        |        |        |        |          |          |          |
|-----|-------|-----|--------|--------|--------|--------|----------|----------|----------|
| ITS | OTU12 | L*T | UPRS   | UPRS   | High T | Low T  | 6.407157 | 4.616873 | 8.19744  |
| ITS | OTU13 | L   | Butner | UPRS   |        |        | 0.064204 | -2.69337 | 2.821782 |
| ITS | OTU13 | T   |        |        | High T | Low T  | -2.29367 | -4.13829 | -0.44904 |
| ITS | OTU13 | L*T | Butner | Butner | High T | Low T  | -4.59215 | -8.18131 | -1.00298 |
| ITS | OTU13 | L*T | Butner | UPRS   | High T | High T | -2.23428 | -5.13946 | 0.670903 |
| ITS | OTU13 | L*T | Butner | UPRS   | High T | Low T  | -2.22946 | -5.51933 | 1.060404 |
| ITS | OTU13 | L*T | Butner | UPRS   | Low T  | High T | 2.357869 | -0.98736 | 5.703094 |
| ITS | OTU13 | L*T | Butner | UPRS   | Low T  | Low T  | 2.362684 | -2.41749 | 7.14286  |
| ITS | OTU13 | L*T | UPRS   | UPRS   | High T | Low T  | 0.004815 | -3.15823 | 3.167861 |
| ITS | OTU14 | L   | Butner | UPRS   |        |        | 2.753611 | 0.67508  | 4.832143 |
| ITS | OTU14 | T   |        |        | High T | Low T  | 3.140794 | 1.174715 | 5.106872 |
| ITS | OTU14 | L*T | Butner | Butner | High T | Low T  | 2.519926 | -0.67407 | 5.713918 |
| ITS | OTU14 | L*T | Butner | UPRS   | High T | High T | 2.132743 | -0.60988 | 4.875366 |
| ITS | OTU14 | L*T | Butner | UPRS   | High T | Low T  | 5.894405 | 3.130734 | 8.658077 |
| ITS | OTU14 | L*T | Butner | UPRS   | Low T  | High T | -0.38718 | -3.34246 | 2.568091 |
| ITS | OTU14 | L*T | Butner | UPRS   | Low T  | Low T  | 3.37448  | -0.21847 | 6.96743  |
| ITS | OTU14 | L*T | UPRS   | UPRS   | High T | Low T  | 3.761662 | 0.70879  | 6.814534 |
| ITS | OTU15 | L   | Butner | UPRS   |        |        | -1.43835 | -4.25707 | 1.380381 |
| ITS | OTU15 | T   |        |        | High T | Low T  | -2.27875 | -4.9116  | 0.354097 |
| ITS | OTU15 | L*T | Butner | Butner | High T | Low T  | 4.204429 | -0.09988 | 8.508733 |
| ITS | OTU15 | L*T | Butner | UPRS   | High T | High T | 5.044834 | 1.196281 | 8.893388 |
| ITS | OTU15 | L*T | Butner | UPRS   | High T | Low T  | -3.7171  | -7.1617  | -0.27249 |
| ITS | OTU15 | L*T | Butner | UPRS   | Low T  | High T | 0.840405 | -3.38912 | 5.069935 |
| ITS | OTU15 | L*T | Butner | UPRS   | Low T  | Low T  | -7.92152 | -12.081  | -3.76207 |
| ITS | OTU15 | L*T | UPRS   | UPRS   | High T | Low T  | -8.76193 | -12.1617 | -5.36212 |
| ITS | OTU16 | L   | Butner | UPRS   |        |        | -0.01016 | -1.75645 | 1.736141 |
| ITS | OTU16 | T   |        |        | High T | Low T  | -2.15953 | -3.56064 | -0.75842 |
| ITS | OTU16 | L*T | Butner | Butner | High T | Low T  | -5.57835 | -7.83498 | -3.32171 |
| ITS | OTU16 | L*T | Butner | UPRS   | High T | High T | -3.42897 | -5.77198 | -1.08596 |
| ITS | OTU16 | L*T | Butner | UPRS   | High T | Low T  | -2.16969 | -4.51506 | 0.175687 |
| ITS | OTU16 | L*T | Butner | UPRS   | Low T  | High T | 2.149375 | 0.022277 | 4.276474 |
| ITS | OTU16 | L*T | Butner | UPRS   | Low T  | Low T  | 3.408661 | 1.025288 | 5.792033 |
| ITS | OTU16 | L*T | UPRS   | UPRS   | High T | Low T  | 1.259285 | -0.71679 | 3.235356 |
| ITS | OTU17 | L   | Butner | UPRS   |        |        | -4.41321 | -6.76183 | -2.0646  |
| ITS | OTU17 | T   |        |        | High T | Low T  | -4.2323  | -6.00139 | -2.46322 |
| ITS | OTU17 | L*T | Butner | Butner | High T | Low T  | -1.31257 | -4.46854 | 1.843409 |
| ITS | OTU17 | L*T | Butner | UPRS   | High T | High T | -1.49348 | -4.37045 | 1.383493 |
| ITS | OTU17 | L*T | Butner | UPRS   | High T | Low T  | -8.64552 | -11.5737 | -5.71733 |
| ITS | OTU17 | L*T | Butner | UPRS   | Low T  | High T | -0.18091 | -3.13337 | 2.771549 |
| ITS | OTU17 | L*T | Butner | UPRS   | Low T  | Low T  | -7.33295 | -11.2567 | -3.40925 |
| ITS | OTU17 | L*T | UPRS   | UPRS   | High T | Low T  | -7.15204 | -10.142  | -4.16212 |

|     |       |     |        |        |        |        |          |          |          |
|-----|-------|-----|--------|--------|--------|--------|----------|----------|----------|
| ITS | OTU19 | L   | Butner | UPRS   |        |        | -0.49093 | -2.92441 | 1.942545 |
| ITS | OTU19 | T   |        |        | High T | Low T  | 0.488771 | -1.60468 | 2.58222  |
| ITS | OTU19 | L*T | Butner | Butner | High T | Low T  | 0.48697  | -3.39444 | 4.368375 |
| ITS | OTU19 | L*T | Butner | UPRS   | High T | High T | -0.49273 | -3.43174 | 2.446269 |
| ITS | OTU19 | L*T | Butner | UPRS   | High T | Low T  | -0.00216 | -2.85536 | 2.851037 |
| ITS | OTU19 | L*T | Butner | UPRS   | Low T  | High T | -0.9797  | -4.5107  | 2.551293 |
| ITS | OTU19 | L*T | Butner | UPRS   | Low T  | Low T  | -0.48913 | -4.82111 | 3.842845 |
| ITS | OTU19 | L*T | UPRS   | UPRS   | High T | Low T  | 0.490572 | -2.55243 | 3.533578 |
| ITS | OTU20 | L   | Butner | UPRS   |        |        | -0.11518 | -4.36276 | 4.132398 |
| ITS | OTU20 | T   |        |        | High T | Low T  | 7.656436 | 3.371684 | 11.94119 |
| ITS | OTU20 | L*T | Butner | Butner | High T | Low T  | 9.422291 | -0.44257 | 19.28715 |
| ITS | OTU20 | L*T | Butner | UPRS   | High T | High T | 1.650676 | -6.23061 | 9.531957 |
| ITS | OTU20 | L*T | Butner | UPRS   | High T | Low T  | 7.541256 | 2.440694 | 12.64182 |
| ITS | OTU20 | L*T | Butner | UPRS   | Low T  | High T | -7.77161 | -14.6117 | -0.93156 |
| ITS | OTU20 | L*T | Butner | UPRS   | Low T  | Low T  | -1.88103 | -11.0961 | 7.334004 |
| ITS | OTU20 | L*T | UPRS   | UPRS   | High T | Low T  | 5.890581 | -1.20522 | 12.98638 |
| ITS | OTU21 | L   | Butner | UPRS   |        |        | 3.356127 | -1.07985 | 7.792104 |
| ITS | OTU21 | T   |        |        | High T | Low T  | -4.19734 | -10.337  | 1.942278 |
| ITS | OTU21 | L*T | Butner | Butner | High T | Low T  | -9.51924 | -21.8529 | 2.814426 |
| ITS | OTU21 | L*T | Butner | UPRS   | High T | High T | -1.96577 | -8.38614 | 4.454587 |
| ITS | OTU21 | L*T | Butner | UPRS   | High T | Low T  | -0.84122 | -6.60062 | 4.918188 |
| ITS | OTU21 | L*T | Butner | UPRS   | Low T  | High T | 7.553469 | -1.47842 | 16.58535 |
| ITS | OTU21 | L*T | Butner | UPRS   | Low T  | Low T  | 8.678028 | -1.28618 | 18.64223 |
| ITS | OTU21 | L*T | UPRS   | UPRS   | High T | Low T  | 1.124559 | -3.81721 | 6.066326 |
| ITS | OTU22 | L   | Butner | UPRS   |        |        | 1.914468 | -0.27924 | 4.108176 |
| ITS | OTU22 | T   |        |        | High T | Low T  | 2.39206  | 0.472757 | 4.311363 |
| ITS | OTU22 | L*T | Butner | Butner | High T | Low T  | 2.000524 | -0.86581 | 4.866859 |
| ITS | OTU22 | L*T | Butner | UPRS   | High T | High T | 1.522932 | -1.14778 | 4.193641 |
| ITS | OTU22 | L*T | Butner | UPRS   | High T | Low T  | 4.306529 | 1.227161 | 7.385896 |
| ITS | OTU22 | L*T | Butner | UPRS   | Low T  | High T | -0.47759 | -3.21797 | 2.262782 |
| ITS | OTU22 | L*T | Butner | UPRS   | Low T  | Low T  | 2.306005 | -1.51122 | 6.123228 |
| ITS | OTU22 | L*T | UPRS   | UPRS   | High T | Low T  | 2.783597 | -0.56763 | 6.134827 |
| ITS | OTU24 | L   | Butner | UPRS   |        |        | 2.428219 | -0.42562 | 5.282057 |
| ITS | OTU24 | T   |        |        | High T | Low T  | -1.94012 | -3.57703 | -0.30321 |
| ITS | OTU24 | L*T | Butner | Butner | High T | Low T  | -3.16584 | -6.5054  | 0.173711 |
| ITS | OTU24 | L*T | Butner | UPRS   | High T | High T | 1.2025   | -1.43301 | 3.838007 |
| ITS | OTU24 | L*T | Butner | UPRS   | High T | Low T  | 0.488095 | -2.89978 | 3.875966 |
| ITS | OTU24 | L*T | Butner | UPRS   | Low T  | High T | 4.368342 | 1.179286 | 7.557398 |
| ITS | OTU24 | L*T | Butner | UPRS   | Low T  | Low T  | 3.653937 | -1.278   | 8.585877 |
| ITS | OTU24 | L*T | UPRS   | UPRS   | High T | Low T  | -0.71441 | -3.74549 | 2.31668  |
| ITS | OTU25 | L   | Butner | UPRS   |        |        | 2.773539 | 1.679278 | 3.867799 |

|     |       |     |        |        |        |        |          |          |          |
|-----|-------|-----|--------|--------|--------|--------|----------|----------|----------|
| ITS | OTU25 | T   |        |        | High T | Low T  | 0.907391 | -0.08462 | 1.899402 |
| ITS | OTU25 | L*T | Butner | Butner | High T | Low T  | 0.946913 | -0.7276  | 2.621425 |
| ITS | OTU25 | L*T | Butner | UPRS   | High T | High T | 2.813061 | 1.305373 | 4.320749 |
| ITS | OTU25 | L*T | Butner | UPRS   | High T | Low T  | 3.680929 | 2.205634 | 5.156225 |
| ITS | OTU25 | L*T | Butner | UPRS   | Low T  | High T | 1.866148 | 0.387471 | 3.344825 |
| ITS | OTU25 | L*T | Butner | UPRS   | Low T  | Low T  | 2.734016 | 0.968074 | 4.499958 |
| ITS | OTU25 | L*T | UPRS   | UPRS   | High T | Low T  | 0.867868 | -0.60218 | 2.337918 |
| ITS | OTU26 | L   | Butner | UPRS   |        |        | 2.422079 | 1.19623  | 3.647928 |
| ITS | OTU26 | T   |        |        | High T | Low T  | 1.660009 | 0.563667 | 2.756351 |
| ITS | OTU26 | L*T | Butner | Butner | High T | Low T  | 1.521485 | -0.17799 | 3.220958 |
| ITS | OTU26 | L*T | Butner | UPRS   | High T | High T | 2.283555 | 0.561402 | 4.005709 |
| ITS | OTU26 | L*T | Butner | UPRS   | High T | Low T  | 4.082088 | 2.391451 | 5.772725 |
| ITS | OTU26 | L*T | Butner | UPRS   | Low T  | High T | 0.76207  | -0.83514 | 2.359284 |
| ITS | OTU26 | L*T | Butner | UPRS   | Low T  | Low T  | 2.560603 | 0.688232 | 4.432974 |
| ITS | OTU26 | L*T | UPRS   | UPRS   | High T | Low T  | 1.798533 | 0.071715 | 3.525351 |
| ITS | OTU27 | L   | Butner | UPRS   |        |        | -1.63414 | -3.16342 | -0.10487 |
| ITS | OTU27 | T   |        |        | High T | Low T  | 2.643318 | 1.316042 | 3.970594 |
| ITS | OTU27 | L*T | Butner | Butner | High T | Low T  | 0.534329 | -1.68549 | 2.754153 |
| ITS | OTU27 | L*T | Butner | UPRS   | High T | High T | -3.74313 | -5.64751 | -1.83875 |
| ITS | OTU27 | L*T | Butner | UPRS   | High T | Low T  | 1.009175 | -0.98701 | 3.005356 |
| ITS | OTU27 | L*T | Butner | UPRS   | Low T  | High T | -4.27746 | -6.33074 | -2.22418 |
| ITS | OTU27 | L*T | Butner | UPRS   | Low T  | Low T  | 0.474846 | -2.07752 | 3.027216 |
| ITS | OTU27 | L*T | UPRS   | UPRS   | High T | Low T  | 4.752307 | 2.737463 | 6.76715  |
| ITS | OTU31 | L   | Butner | UPRS   |        |        | 0.358207 | -1.00641 | 1.722828 |
| ITS | OTU31 | T   |        |        | High T | Low T  | 1.573575 | 0.37325  | 2.7739   |
| ITS | OTU31 | L*T | Butner | Butner | High T | Low T  | 2.013661 | 0.16418  | 3.863142 |
| ITS | OTU31 | L*T | Butner | UPRS   | High T | High T | 0.798293 | -0.85141 | 2.447995 |
| ITS | OTU31 | L*T | Butner | UPRS   | High T | Low T  | 1.931781 | 0.175402 | 3.68816  |
| ITS | OTU31 | L*T | Butner | UPRS   | Low T  | High T | -1.21537 | -3.09182 | 0.661085 |
| ITS | OTU31 | L*T | Butner | UPRS   | Low T  | Low T  | -0.08188 | -2.16037 | 1.996615 |
| ITS | OTU31 | L*T | UPRS   | UPRS   | High T | Low T  | 1.133489 | -0.53332 | 2.800298 |
| ITS | OTU34 | L   | Butner | UPRS   |        |        | 4.744189 | 2.457091 | 7.031286 |
| ITS | OTU34 | T   |        |        | High T | Low T  | -0.04225 | -1.80247 | 1.717974 |
| ITS | OTU34 | L*T | Butner | Butner | High T | Low T  | 0.965479 | -1.72313 | 3.654087 |
| ITS | OTU34 | L*T | Butner | UPRS   | High T | High T | 5.751913 | 3.184043 | 8.319784 |
| ITS | OTU34 | L*T | Butner | UPRS   | High T | Low T  | 4.701943 | 1.654345 | 7.749541 |
| ITS | OTU34 | L*T | Butner | UPRS   | Low T  | High T | 4.786434 | 2.071563 | 7.501305 |
| ITS | OTU34 | L*T | Butner | UPRS   | Low T  | Low T  | 3.736464 | -0.09492 | 7.56785  |
| ITS | OTU34 | L*T | UPRS   | UPRS   | High T | Low T  | -1.04997 | -4.17727 | 2.077326 |
| ITS | OTU36 | L   | Butner | UPRS   |        |        | 0.042844 | -8.32204 | 8.407731 |
| ITS | OTU36 | T   |        |        | High T | Low T  | 3.873232 | -1.29265 | 9.039115 |

|     |       |     |        |        |        |        |          |          |          |
|-----|-------|-----|--------|--------|--------|--------|----------|----------|----------|
| ITS | OTU36 | L*T | Butner | Butner | High T | Low T  | 4.229728 | -8.17034 | 16.62979 |
| ITS | OTU36 | L*T | Butner | UPRS   | High T | High T | 0.399339 | -8.78095 | 9.579629 |
| ITS | OTU36 | L*T | Butner | UPRS   | High T | Low T  | 3.916076 | -7.26048 | 15.09264 |
| ITS | OTU36 | L*T | Butner | UPRS   | Low T  | High T | -3.83039 | -12.1008 | 4.440034 |
| ITS | OTU36 | L*T | Butner | UPRS   | Low T  | Low T  | -0.31365 | -17.1531 | 16.52585 |
| ITS | OTU36 | L*T | UPRS   | UPRS   | High T | Low T  | 3.516737 | -7.77551 | 14.80898 |
| ITS | OTU38 | L   | Butner | UPRS   |        |        | 2.694065 | 1.325001 | 4.06313  |
| ITS | OTU38 | T   |        |        | High T | Low T  | 3.574748 | 2.228328 | 4.921167 |
| ITS | OTU38 | L*T | Butner | Butner | High T | Low T  | 1.920035 | -0.24417 | 4.084245 |
| ITS | OTU38 | L*T | Butner | UPRS   | High T | High T | 1.039353 | -0.82489 | 2.903601 |
| ITS | OTU38 | L*T | Butner | UPRS   | High T | Low T  | 6.268813 | 4.22241  | 8.315216 |
| ITS | OTU38 | L*T | Butner | UPRS   | Low T  | High T | -0.88068 | -2.66579 | 0.904423 |
| ITS | OTU38 | L*T | Butner | UPRS   | Low T  | Low T  | 4.348778 | 2.117696 | 6.579859 |
| ITS | OTU38 | L*T | UPRS   | UPRS   | High T | Low T  | 5.22946  | 3.319916 | 7.139004 |
| ITS | OTU42 | L   | Butner | UPRS   |        |        | 0.483868 | -1.72407 | 2.691809 |
| ITS | OTU42 | T   |        |        | High T | Low T  | 0.269036 | -1.50839 | 2.04646  |
| ITS | OTU42 | L*T | Butner | Butner | High T | Low T  | 0.925404 | -2.82725 | 4.678057 |
| ITS | OTU42 | L*T | Butner | UPRS   | High T | High T | 1.140236 | -1.92212 | 4.202591 |
| ITS | OTU42 | L*T | Butner | UPRS   | High T | Low T  | 0.752904 | -1.96311 | 3.468915 |
| ITS | OTU42 | L*T | Butner | UPRS   | Low T  | High T | 0.214831 | -2.73335 | 3.16301  |
| ITS | OTU42 | L*T | Butner | UPRS   | Low T  | Low T  | -0.1725  | -4.62848 | 4.283474 |
| ITS | OTU42 | L*T | UPRS   | UPRS   | High T | Low T  | -0.38733 | -3.81075 | 3.036086 |
| ITS | OTU44 | L   | Butner | UPRS   |        |        | 4.075408 | -0.49875 | 8.649562 |
| ITS | OTU44 | T   |        |        | High T | Low T  | 4.56962  | -0.28045 | 9.419691 |
| ITS | OTU44 | L*T | Butner | Butner | High T | Low T  | 7.848536 | 1.301644 | 14.39543 |
| ITS | OTU44 | L*T | Butner | UPRS   | High T | High T | 7.354323 | 1.029781 | 13.67886 |
| ITS | OTU44 | L*T | Butner | UPRS   | High T | Low T  | 8.645028 | 2.165352 | 15.1247  |
| ITS | OTU44 | L*T | Butner | UPRS   | Low T  | High T | -0.49421 | -7.343   | 6.354579 |
| ITS | OTU44 | L*T | Butner | UPRS   | Low T  | Low T  | 0.796492 | -5.24794 | 6.840927 |
| ITS | OTU44 | L*T | UPRS   | UPRS   | High T | Low T  | 1.290705 | -4.94418 | 7.525594 |
| ITS | OTU49 | L   | Butner | UPRS   |        |        | 2.134644 | 0.87893  | 3.390358 |
| ITS | OTU49 | T   |        |        | High T | Low T  | 3.655169 | 2.469145 | 4.841192 |
| ITS | OTU49 | L*T | Butner | Butner | High T | Low T  | 2.67762  | 0.97343  | 4.381811 |
| ITS | OTU49 | L*T | Butner | UPRS   | High T | High T | 1.157095 | -0.35214 | 2.666326 |
| ITS | OTU49 | L*T | Butner | UPRS   | High T | Low T  | 5.789813 | 3.950667 | 7.628958 |
| ITS | OTU49 | L*T | Butner | UPRS   | Low T  | High T | -1.52052 | -3.12816 | 0.087108 |
| ITS | OTU49 | L*T | Butner | UPRS   | Low T  | Low T  | 3.112192 | 1.101708 | 5.122676 |
| ITS | OTU49 | L*T | UPRS   | UPRS   | High T | Low T  | 4.632717 | 2.879085 | 6.386349 |
