# Supplementary material for: Beef cattle that respond differently to fescue toxicosis have distinct gastrointestinal tract microbiota
Source: PubMed Central journal article supplement (PMC7377488; doi:10.1371/journal.pone.0229192), 2020-07-23
Supplement: pone.0229192.s005.pdf [file pone.0229192.s005.pdf]

**Table S3. Residual variance ( $\sigma_e^2$ )<sup>1</sup> for each window period (WP), and AWG\_res<sup>2</sup> means for each WP by genetic group (GG)**

| WP   | $\sigma_e^2$                 | GG <sup>3</sup>           |                           |
|------|------------------------------|---------------------------|---------------------------|
|      |                              | HT                        | LT                        |
| 1_7  | 6.0001 <sup>A</sup> (0.7096) | 3.74 <sup>a</sup> (0.26)  | -3.52 <sup>c</sup> (0.26) |
| 1_13 | 0.0707 <sup>C</sup> (0.008)  | 0.29 <sup>b</sup> (0.26)  | -0.29 <sup>b</sup> (0.26) |
| 7_13 | 2.9418 <sup>B</sup> (0.348)  | -0.03 <sup>b</sup> (0.26) | 0.05 <sup>b</sup> (0.26)  |

<sup>1</sup>Estimated from Eq.2 and expressed as (kg/week)<sup>2</sup>;

<sup>2</sup>Residuals of average weekly gain (from Eq. 1, analyzed with Eq. 3). Expressed as kg/week;

<sup>3</sup>HT, high tolerance; LT, low tolerance;

<sup>A-C</sup>Variances lacking common superscripts are statistically different ( $P < 0.001$ ) based on F-test;

<sup>a-c</sup>Least-squares means of AWG\_res lacking common superscripts are statistically different ( $P < 0.001$ ) based of Tukey's test;

Standard errors within parentheses.
