# Supplementary material for: Beef cattle that respond differently to fescue toxicosis have distinct gastrointestinal tract microbiota
Source: PubMed Central journal article supplement (PMC7377488; doi:10.1371/journal.pone.0229192), 2020-07-23
Supplement: pone.0229192.s006.pdf [file pone.0229192.s006.pdf]

**Table S4: The 50 most abundant 16S rRNA gene OTUs**

| OTU      | Number of sequences | Relative abundance (%) LT | Relative abundance (%) HT | Phylum                | Taxonomy (Silva v138), NCBI best BLAST hit and GenBank accession no., similarity (%)                      |
|----------|---------------------|---------------------------|---------------------------|-----------------------|-----------------------------------------------------------------------------------------------------------|
| OTU00001 | 289,015             | 8.2                       | 6.1                       | <i>Firmicutes</i>     | <i>Oscillospiraceae</i> UCG-005 (99.6%), <i>Oscillibacter</i> sp. strain 128x MK287653.1, 91.3%           |
| OTU00002 | 241,040             | 1.3                       | 11.4                      | <i>Firmicutes</i>     | <i>Solibacillus</i> (99.6%), <i>Solibacillus silvestris</i> strain UF03 KF717516.1, 100%                  |
| OTU00003 | 185,984             | 1.3                       | 8.5                       | <i>Proteobacteria</i> | <i>Acinetobacter</i> (100%), <i>Acinetobacter lwoffii</i> strain P40 MT323129.1, 100%                     |
| OTU00004 | 128,365             | 1.6                       | 5.1                       | <i>Firmicutes</i>     | <i>Bacillus</i> (98%), <i>Bacillus</i> sp. DSL09-2 AB576893.1, 99.6%                                      |
| OTU00005 | 91,422              | 2.6                       | 2.0                       | <i>Firmicutes</i>     | <i>Oscillospiraceae</i> UCG-005 (100%), <i>Monoglobus pectinilyticus</i> strain ASD1037 MK615117.1, 93.7% |
| OTU00006 | 79,040              | 2.7                       | 1.4                       | <i>Firmicutes</i>     | <i>Peptostreptococcaceae</i> (100%), <i>Romboutsia</i> sp. CE17 CP051144.1, 100%                          |
| OTU00007 | 74,814              | 1.8                       | 1.9                       | <i>Bacteroidetes</i>  | <i>Prevotellaceae</i> UCG-004 (88.5%), <i>Bacteroides gallinarum</i> strain Bg MT152630.1, 88.6%          |
| OTU00008 | 55,633              | 1.5                       | 1.3                       | <i>Bacteroidetes</i>  | <i>Bacteroides</i> (92.1%), <i>Bacteroides</i> sp. Marseille-P3684 LT985388.1, 92.5%                      |
| OTU00009 | 55,207              | 1.5                       | 1.2                       | <i>Firmicutes</i>     | <i>Planococcaceae</i> (99.6%), <i>Lysinibacillus sphaericus</i> strain KCCM 35418 CP026120.1, 100%        |
| OTU00010 | 45,924              | 1.2                       | 1.0                       | <i>Bacteroidetes</i>  | <i>Rikenellaceae</i> RC9 gut group (90.5%)                                                                |
| OTU00011 | 45,651              | 1.4                       | 1.0                       | <i>Firmicutes</i>     | <i>Peptostreptococcaceae</i> (100%), <i>Enterococcus faecalis</i> strain BFFF11 CP045918.1, 100%          |
| OTU00012 | 36,880              | 1.0                       | 0.8                       | <i>Firmicutes</i>     | <i>Oscillospiraceae</i> UCG-005 (100%), <i>Oscillibacter</i> sp. strain 128x MK287653.1, 95.3%            |
| OTU00013 | 36,595              | 0.9                       | 0.9                       | <i>Bacteroidetes</i>  | <i>Bacteroides</i> (92.5%), <i>Bacteroides plebeius</i> DSM 17135 NR_041277.1, 92.5%                      |
| OTU00014 | 34,271              | 1.0                       | 0.6                       | <i>Firmicutes</i>     | <i>Planococcaceae</i> (100%), <i>Lysinibacillus pakistanensis</i> strain J20BS9 MT415995.1, 100%          |
| OTU00015 | 33,558              | 1.2                       | 0.5                       | <i>Firmicutes</i>     | <i>Peptostreptococcaceae</i> (99.2%), <i>Clostridioides difficile</i> strain TW11-RT078 CP035499.1, 99.2% |
| OTU00016 | 30,900              | 0.8                       | 0.7                       | <i>Firmicutes</i>     | <i>Oscillospiraceae</i> UCG-005 (98.8%), <i>Oscillibacter</i> sp. strain 128x MK287653.1, 90.1%           |
| OTU00017 | 30,226              | 0.7                       | 0.8                       | <i>Bacteroidetes</i>  | <i>Rikenellaceae</i> RC9 gut group (91.7%)                                                                |
| OTU00018 | 25,949              | 0.9                       | 0.4                       | <i>Firmicutes</i>     | <i>Clostridia</i> (99.2%), <i>Clostridiales</i> bacterium P40 AB730752.1, 93.68%                          |
| OTU00019 | 23,250              | 0.7                       | 0.5                       | <i>Bacteroidetes</i>  | <i>Rikenellaceae</i> RC9 gut group (90.9%)                                                                |
| OTU00020 | 20,683              | 0.7                       | 0.4                       | <i>Firmicutes</i>     | <i>Mogibacterium</i> (98.8%), <i>Mogibacterium timidum</i> strain KCOM MT242492.1, 94.5%                  |
| OTU00021 | 20,366              | 0.6                       | 0.5                       | <i>Firmicutes</i>     | uncultured <i>Ruminococcaceae</i> (92.5%), <i>Ruminococcus</i> sp. strain FBDS KY643811.1, 91.7%          |
| OTU00022 | 20,316              | 0.1                       | 0.9                       | <i>Firmicutes</i>     | <i>Planococcaceae</i> (99.6%), <i>Psychrobacillus psychrodurans</i> strain EB313 MH127767.1, 100%         |
| OTU00023 | 20,114              | 0.5                       | 0.5                       | <i>Bacteroidetes</i>  | <i>Alistipes</i> (94.9%), <i>Alistipes fingoldii</i> strain DSM 17242 NR_102944.1, 96.1%                  |
| OTU00024 | 19,425              | 0.5                       | 0.5                       | <i>Bacteroidetes</i>  | <i>Rikenellaceae</i> RC9 gut group (90.9%),                                                               |

|          |        |     |     |                       |                                                                                                                       |
|----------|--------|-----|-----|-----------------------|-----------------------------------------------------------------------------------------------------------------------|
| OTU00025 | 19,212 | 0.9 | 0.1 | <i>Actinobacteria</i> | <i>Corynebacterium</i> (99.6%), <i>Corynebacterium kutscheri</i> strain NCTC3655 LR134407.1, 99.6%                    |
| OTU00026 | 19,171 | 0.7 | 0.3 | <i>Euryarchaeota</i>  | <i>Methanobrevibacter</i> (99.2%), <i>Methanobrevibacter</i> sp. YE315 CP010834.1, 100%                               |
| OTU00027 | 18,306 | 0.3 | 0.6 | <i>Bacteroidetes</i>  | <i>Bacteroidales</i> p-2534-18B5 gut group (86.6%), <i>Anaerocella delicata</i> strain WN081 NR_132392.1, 87.8%       |
| OTU00028 | 18,196 | 0.5 | 0.4 | <i>Bacteroidetes</i>  | <i>Bacteroides</i> (92.1%), <i>Bacteroides coprocola</i> DSM 17136 NR_041278.1, 92.1%                                 |
| OTU00029 | 16,881 | 0.5 | 0.3 | <i>Firmicutes</i>     | <i>Oscillospiraceae</i> UCG-005 (97.2%), <i>Oscillibacter</i> sp. strain 128x MK287653.1, 94.5%                       |
| OTU00030 | 16,430 | 0.5 | 0.3 | <i>Firmicutes</i>     | <i>Christensenellaceae</i> R-7 group (96%), <i>Bacterium</i> R2 JN688050.1, 97.2%                                     |
| OTU00031 | 16,351 | 0.5 | 0.3 | <i>Bacteroidetes</i>  | <i>Anaerocella delicata</i> strain WN081 NR_132392.1, 87.1%                                                           |
| OTU00032 | 16,174 | 0.5 | 0.3 | <i>Firmicutes</i>     | <i>Christensenellaceae</i> R-7 group (95.3%), <i>Bacterium</i> AC2043 KF697809.1, 95.3%                               |
| OTU00033 | 16,164 | 0.4 | 0.4 | <i>Bacteroidetes</i>  | <i>Rikenellaceae</i> RC9 gut group (91.3%)                                                                            |
| OTU00034 | 15,214 | 0.4 | 0.4 | <i>Bacteroidetes</i>  | <i>Rikenellaceae</i> dgA-11 gut group (89.3%)                                                                         |
| OTU00035 | 15,190 | 0.4 | 0.4 | <i>Bacteroidetes</i>  | <i>Bacteroides</i> (94.9%), <i>Bacteroides plebeius</i> DSM 17135 NR_041277.1, 94.9%                                  |
| OTU00036 | 15,148 | 0.2 | 0.6 | <i>Actinobacteria</i> | <i>Arthrobacter</i> (100%), <i>Arthrobacter citreus</i> strain Y34A9 MT367753.1, 100%                                 |
| OTU00037 | 15,099 | 0.4 | 0.4 | <i>Firmicutes</i>     | <i>Butyricicoccaceae</i> UCG-009 (93.7%), <i>Papillibacter cinnamivorans</i> strain CIN1 NR_025025.1, 93.7%           |
| OTU00038 | 15,024 | 0.5 | 0.2 | <i>Firmicutes</i>     | <i>Clostridia</i> (100%), Rumen bacterium strain XS0-10 MH594342.1, 100%                                              |
| OTU00039 | 14,711 | 0.4 | 0.4 | <i>Bacteroidetes</i>  | <i>Prevotellaceae</i> UCG-003 (92%), <i>Alloprevotella</i> sp. feline oral taxon 309 KM462157.1, 93.7%                |
| OTU00040 | 13,842 | 0.4 | 0.3 | <i>Firmicutes</i>     | uncultured <i>Lachnospiraceae</i> (99.2%), <i>Anaerotignum faecicola</i> strain KGMB03357 NR_165727.1, 98%            |
| OTU00041 | 13,733 | 0.4 | 0.3 | <i>Bacteroidetes</i>  | <i>Alistipes</i> (94.9%), <i>Alistipes fingoldii</i> strain DSM 17242 NR_102944.1, 95.7%                              |
| OTU00042 | 13,493 | 0.4 | 0.2 | <i>Firmicutes</i>     | <i>Christensenellaceae</i> R-7 group (96.8%), <i>Bacterium</i> AC2043 KF697809.1, 96.1%                               |
| OTU00043 | 13,473 | 0.4 | 0.3 | <i>Firmicutes</i>     | <i>Christensenellaceae</i> R-7 group (96.8%), <i>Christensenellaceae</i> bacterium LC333712.1, 97.6%                  |
| OTU00044 | 13,284 | 0.4 | 0.3 | <i>Firmicutes</i>     | <i>Anaerovoracaceae</i> Family XIII AD3011 group (97.6%), <i>Emergencia timonensis</i> strain SN18 NR_144737.1, 95.2% |
| OTU00045 | 13,150 | 0.5 | 0.1 | <i>Firmicutes</i>     | <i>Lachnospiraceae</i> NK3A20 group (99.6%), <i>Bacterium</i> strain DSM_11001 MN336244.1, 99.6%                      |
| OTU00046 | 12,955 | 0.3 | 0.3 | <i>Firmicutes</i>     | <i>Planococcaceae</i> (99.2%), <i>Solibacillus isronensis</i> strain Ba2SD-3 MT373594.1, 99.2%                        |
| OTU00047 | 12,948 | 0.3 | 0.3 | <i>Firmicutes</i>     | <i>Bacteria</i> (93.7%), <i>Monoglobus pectinilyticus</i> strain ASD1037 MK615117.1, 92.9%                            |
| OTU00048 | 12,924 | 0.3 | 0.3 | <i>Bacteroidetes</i>  | <i>Rikenellaceae</i> RC9 gut group (92.5%), %)                                                                        |
| OTU00049 | 12,471 | 0.3 | 0.4 | <i>Bacteroidetes</i>  | <i>Rikenellaceae</i> dgA-11 gut group (89.7%), %)                                                                     |
| OTU00050 | 12,466 | 0.4 | 0.2 | <i>Tenericutes</i>    | <i>Mollicutes</i> RF39 (98%), <i>Spiroplasma velocrescens</i> strain MQ-4 NR_025713.1, 87.7%                          |
