# Supplementary material for: Beef cattle that respond differently to fescue toxicosis have distinct gastrointestinal tract microbiota
Source: PubMed Central journal article supplement (PMC7377488; doi:10.1371/journal.pone.0229192), 2020-07-23
Supplement: pone.0229192.s007.pdf [file pone.0229192.s007.pdf]

**Table S5: The 50 most abundant ITS1 OTUs**

| OTU      | Number of sequences | Relative abundance (%) HT | Relative abundance (%) LT | UNITE (V8) Classification                           | Taxonomy (NCBI Blast), GenBank accession no., similarity (%)        |
|----------|---------------------|---------------------------|---------------------------|-----------------------------------------------------|---------------------------------------------------------------------|
| OTU00001 | 50,275              | 17                        | 8.6                       | <i>Pleosporales</i> MH633965 (99.6%)                | <i>Microsphaeropsis arundinis</i> ; AB775571; 99%                   |
| OTU00002 | 25,250              | 0                         | 13.2                      | <i>Thelebolus</i> KP714650 (100%)                   | <i>Thelebolus</i> sp. MKOTU58; KP714650; 100%                       |
| OTU00003 | 23,768              | 2.1                       | 10.3                      | <i>Thelebolus</i> KP714650 (99.6%)                  | <i>Thelebolus</i> sp. MKOTU58; KP714650; 99%                        |
| OTU00004 | 15,241              | 7.6                       | 0                         | <i>Ascomycota</i> KP698358 (100%)                   | <i>Pleosporales</i> sp. 418H; HE653990; 100%                        |
| OTU00005 | 11,844              | 3.6                       | 2.4                       | <i>Letendraea</i> LT796897 (99.6%)                  | <i>Microsphaeropsis</i> sp. JSM 06261702; KY086256; 98%             |
| OTU00006 | 11,448              | 5.5                       | 0.2                       | <i>Psilocybe</i> KJ182745 (100%)                    | <i>Psilocybe</i> cf. <i>subviscida/crobula</i> X-45; KC176337; 95%  |
| OTU00007 | 11,030              | 1.1                       | 4.6                       | <i>Thelebolus</i> KP714650 (99.6%)                  | <i>Thelebolus</i> sp. MKOTU58; KP714650; 99%                        |
| OTU00008 | 11,003              | 5.5                       | 0                         | <i>Thelebolus</i> KP714650 (99.6%)                  | <i>Thelebolus</i> sp. MKOTU58; KP714650; 99%                        |
| OTU00009 | 9,407               | 0.6                       | 4.3                       | <i>Pyronemataceae</i> FJ553261 (99.6%)              | <i>Pyronemataceae</i> sp. F79; KT809108; 98%                        |
| OTU00010 | 8,690               | 0                         | 4.6                       | <i>Thelebolus</i> KP714650 (99.6%)                  | <i>Thelebolus</i> sp. MKOTU58; KP714650; 99%                        |
| OTU00011 | 7,540               | 1.7                       | 2.1                       | <i>Pyrenochaetopsis leptospora</i> MF795793 (99.6%) | <i>Pyrenochaetopsis leptospora</i> strain CBS 101635; MF795793; 99% |
| OTU00012 | 7,220               | 2.4                       | 1.2                       | <i>Letendraea</i> LT796908 (99.6%)                  | <i>Microsphaeropsis</i> sp. S4A1ACS; KY305064; 99%                  |
| OTU00013 | 6,955               | 0.1                       | 3.5                       | <i>Thelebolus</i> KP714650 (99.6%)                  | <i>Thelebolus</i> sp. MKOTU58; KP714650; 99%                        |
| OTU00014 | 4,714               | 1.8                       | 0.5                       | <i>Orpinomyces</i> MK036695 (100%)                  | <i>Orpinomyces</i> sp. LT-3; JF747595; 100%                         |
| OTU00015 | 4,666               | 0                         | 2.4                       | <i>Pyrenochaetopsis leptospora</i> MF795793 (99.2%) | <i>Pyrenochaetopsis leptospora</i> strain CBS 101635; MF795793; 99% |
| OTU00016 | 4,298               | 0                         | 2.2                       | <i>Thelebolus</i> KP714650 (99.3%)                  | <i>Thelebolus</i> sp. MKOTU58; KP714650; 99%                        |
| OTU00017 | 4,034               | 0                         | 2.1                       | <i>Thelebolus</i> KP714650 (100%)                   | <i>Thelebolus</i> sp. MKOTU58; KP714650; 100%                       |
| OTU00018 | 3,593               | 0                         | 1.9                       | <i>Thelebolus</i> KP714650 (99.3%)                  | <i>Thelebolus</i> sp. MKOTU58; KP714650; 99%                        |
| OTU00019 | 2,790               | 0.8                       | 0.7                       | <i>Phaeosphaeriopsis</i> (99.6%)                    | <i>Phaeosphaeriopsis</i> TMS-2011; HQ630983; 99%                    |
| OTU00020 | 2,771               | 1.1                       | 0.3                       | <i>Pyrenochaetopsis leptospora</i> MF795793 (99.6%) | <i>Pyrenochaetopsis leptospora</i> strain CBS 101635; MF795793; 99% |
| OTU00021 | 2,717               | 1.1                       | 0.2                       | <i>Pyrenochaetopsis leptospora</i> (99.6%)          | <i>Pyrenochaetopsis leptospora</i> strain CBS 101635; MF795793; 99% |
| OTU00022 | 2,679               | 1.1                       | 0.3                       | <i>Orpinomyces</i> MK036685 (99.209%)               | <i>Orpinomyces</i> sp. LT-7; JF747596; 99%                          |
| OTU00023 | 2,486               | 0.9                       | 0.3                       | <i>Didymocytis cladoniicola</i> LT796886 (100%)     | <i>Pleosporales</i> sp. MH179; FM995624; 99%                        |
| OTU00024 | 2,367               | 0.2                       | 1                         | <i>Coprinopsis cothurnata</i> AY461833 (100%)       | <i>Coprinopsis cothurnata</i> SFSU DEH548; AY461833; 100%           |

|          |       |     |     |                                                     |                                                                     |
|----------|-------|-----|-----|-----------------------------------------------------|---------------------------------------------------------------------|
| OTU00025 | 2,268 | 0.6 | 0.6 | <i>Caecomyces</i> AB334759 (93.9%)                  | <i>Caecomyces</i> sp. CR4; AB334759; 94%                            |
| OTU00026 | 2,004 | 0.7 | 0.3 | <i>Caecomyces</i> AB334759 (100%)                   | <i>Caecomyces</i> sp. CR4; AB334759; 100%                           |
| OTU00027 | 1,863 | 0.9 | 0.1 | <i>Melanotus caricicola</i> (94.2%)                 | <i>Deconica</i> sp. PB-2016b; KX017213; 92%                         |
| OTU00028 | 1,669 | 0.4 | 0.5 | <i>Pyrenochaetopsis leptospora</i> MF795793 (99.6%) | <i>Pyrenochaetopsis leptospora</i> strain CBS 101635; MF795793; 99% |
| OTU00029 | 1,664 | 0.8 | 0   | <i>Pyrenochaetopsis leptospora</i> MF795793 (99.6%) | <i>Pyrenochaetopsis leptospora</i> strain CBS 101635; MF795793; 99% |
| OTU00030 | 1,657 | 0.8 | 0   | <i>Preussia</i> KX611026 (100%)                     | <i>Preussia</i> sp. JJP-2009a; FJ210518; 99%                        |
| OTU00031 | 1,627 | 0.5 | 0.3 | <i>Cyllamyces</i> GQ850314 (96%)                    | <i>Caecomyces</i> sp. NZB7; JF423621; 87%                           |
| OTU00032 | 1,622 | 0   | 0.9 | <i>Pyrenochaetopsis leptospora</i> MF795793 (99.2%) | <i>Pleosporales</i> sp. NWHC; KX148619; 100%                        |
| OTU00033 | 1,609 | 0.8 | 0   | <i>Pyrenochaetopsis leptospora</i> MF795793 (99.6%) | <i>Pyrenochaetopsis leptospora</i> strain CBS 101635; MF795793; 99% |
| OTU00034 | 1,506 | 0.4 | 0.3 | <i>Orpinomyces</i> JN560954 (98.4%)                 | <i>Orpinomyces</i> sp. NIANP59; EU150190; 98%                       |
| OTU00035 | 1,492 | 0.3 | 0.5 | <i>Neocallimastigaceae</i> JF274494 (91.5%)         | <i>Orpinomyces</i> sp. LT-7; JF747596; 100%                         |
| OTU00036 | 1,467 | 0.6 | 0.1 | <i>Phaeosphaeriopsis</i> KF800186 (99.6%)           | <i>Phaeosphaeriopsis</i> TMS-2011; HQ630983; 99%                    |
| OTU00037 | 1,438 | 0.1 | 0.7 | <i>Preussia</i> FJ210520 (99.6%)                    | <i>Preussia</i> sp. JJP-2009a; FJ210518; 99%                        |
| OTU00038 | 1,414 | 0.5 | 0.2 | uncultured fungi FJ758183 (100%)                    | <i>Pleosporales</i> sp. 1 TMS-2011; HQ631002; 92%                   |
| OTU00039 | 1,322 | 0.5 | 0.2 | <i>Paraphaeosphaeria michotii</i> JF340243 (99.3%)  | <i>Paraphaeosphaeria michotii</i> M15; JF340243; 99%                |
| OTU00040 | 1,317 | 0   | 0.7 | <i>Thelebolus</i> KP714650 (99.6%)                  | <i>Thelebolus</i> sp. MKOTU58; KP714650; 99%                        |
| OTU00041 | 1,298 | 0.6 | 0   | <i>Preussia</i> FJ210520 (100%)                     | <i>Preussia</i> sp. JJP-2009a; FJ210520; 100%                       |
| OTU00042 | 1,288 | 0.3 | 0.3 | <i>Pyrenochaetopsis</i> KF800437 (96.1%)            | <i>Pyrenochaetopsis</i> sp. PG293; AB916515; 96%                    |
| OTU00043 | 1,257 | 0.5 | 0.2 | uncultured fungi JX371448 (100%)                    | <i>Podospora decipiens</i> strain CBS 258.69; KX171946; 99%         |
| OTU00044 | 1,225 | 0.6 | 0   | <i>Preussia</i> FJ210520 (100%)                     | <i>Preussia</i> sp. JJP-2009a; FJ210520; 100%                       |
| OTU00045 | 1,168 | 0.3 | 0.3 | <i>Neocallimastigaceae</i> AM690084 (98%)           | <i>Caecomyces</i> sp. CR4; AB334759; 90%                            |
| OTU00046 | 1,152 | 0   | 0.6 | <i>Thelebolus</i> MK529893 (99.6%)                  | <i>Thelebolus</i> sp. MKOTU58; KP714650; 99%                        |
| OTU00047 | 1,151 | 0   | 0.6 | <i>Chaetothyriales</i> HQ607986 (100%)              | <i>Podospora cochleariformis</i> strain CBS 249.71; AY999123; 97%   |
| OTU00048 | 1,068 | 0.1 | 0.5 | <i>Pyronemataceae</i> FJ553261 (99.3%)              | <i>Pyronemataceae</i> sp. F79; KT809108; 98%                        |
| OTU00049 | 1,016 | 0.4 | 0.1 | unclassified Ascomycota JX545197 (96.2%)            | <i>Pleosporales</i> sp. 5 TMS-2011; HQ631052; 90%                   |
| OTU00050 | 998   | 0.5 | 0   | <i>Pleosporales</i> MH633965 (99.6%)                | <i>Podospora myriasporea</i> strain TJ12; EU888913; 100%            |
