# Supplementary material for: Beef cattle that respond differently to fescue toxicosis have distinct gastrointestinal tract microbiota
Source: PubMed Central journal article supplement (PMC7377488; doi:10.1371/journal.pone.0229192), 2020-07-23
Supplement: pone.0229192.s008.pdf [file pone.0229192.s008.pdf]

## **Reviewer #1:**

### General comments:

In this study, the authors evaluated the composition of fecal bacterial and fungal communities of cattle showing distinct growth performance when exposed to toxic fescue. The aim was to investigate microbial groups potentially associated with to fescue toxicosis tolerance. There are several questions regarding the accuracy of the data presented in this manuscript that needs attention. Normalization of the microbial datasets was not described and alignment of the bacterial and fungal sequences has been done using old versions of the Silva and UNITE databases. These are critical steps for the analyses of microbial communities. In addition, FT tolerance does not appear to be a stable phenotype in the animals under study (major changes according to the window period, variations in potentially relevant OTUs according to geographic location), which makes it difficult to assess the true relevance of the fecal microbiota to the FT tolerance phenotype.

*AU: The data were normalized and we clarified this in the text and below.*

*With regards to the definition of the FT phenotype, we answered reviewer #2 with a comprehensive explanation. In summary, to the best of our knowledge, no other studies have investigated tolerance to FT. We are proposing a model, and as all models, our approach is not perfect. However, we have provided a potential model to identify FT tolerant animals. We hope our explanation satisfies both reviewers.*

### Specific comments:

L43: Suggest rephrasing this statement since it is not possible to predict the functional role of the gastrointestinal microbiota simply based on the analysis of fecal samples.

*AU: We agree and deleted this sentence.*

L43: the same animals or the same breed of cattle? Please clarify.

*AU: We are not sure to what the reviewer refers to here (maybe there is a typo in the line number?): We had mentioned the breed of cattle (Black Angus) in the original manuscript already (L102 in the original manuscript).*

L107-108: It is not clear to the reader how these pastures were evaluated for endophyte infection.

*AU: We are not sure to what the reviewer refers to here. We had explained the methodology for determining the toxin levels in lines 112-118 in the original manuscript. For increased clarity, we now present the data describing the toxin quantification in a separate paragraph in the methods section.*

L148: Based on this statement and the results presented in the manuscript, it seems that the FT tolerance is not a stable phenotype, both over time and geographically.

*AU: Thanks for the comment. Although there is still limited information on the immune response of animals to FT, like in many other types of stress (e.g. viral infection, heat stress, etc), the way that animals respond to these stressors is highly time-dependent. Therefore, in our study we wanted to identify what was the time of stress that mostly impacted the response to FT. In fact, we have been successful in using this approach before in studies about host response to diseases (Serão et al., 2016 Genet Sel Evol.; Waide et al., 2018 Genet Sel Evol.; Sanglard et al., 2020 Sci Rep). Differently than using a*

*standard phenotype, such as growth under ideal conditions, the study of stress-related phenotypes are heavily influenced by the time and levels of exposure, as well as the time of the collection of data. Hence, the identification of the time in which animals showed the largest variability in response to FT would indicate which data should be used to measure response to FT. In addition, it is not expected that an attenuated exposure, such as for one of the farms used in this study, would result in the same variability of FT response in these animals. As we added as one of our references (Berghof et al, 2019), a larger variance indicates stress exposure greater than in a “clean” environment. We hope that there reviewer accepts our explanation.*

L171-177: These sentences should be moved to the results section.

*AU: changed as suggested*

L215 and L229: The 16S rRNA gene reads were aligned to SILVA SSU NR database v128, which is not the most updated and improved version of the database. The current version 138 has increased considerably the number of available SSU sequences (>9,400,000). The same was done with the fungal ITS1 reads (current version of the UNITE database has >714,000 fungal sequences). Therefore, I recommend updating the taxonomic assignment using the recent version of the Silva and the UNITE databases.

*AU: As suggested, we have now classified the bacterial OTUs against the most recent SILVA database (version 138). We have modified the methods section accordingly. No major differences in classification of the OTUs were observed as a result of using the SILVA 138 version. For those OTUs, where the classification by SILVA v138 yielded different results, the taxonomy was adjusted accordingly. Similarly, the fungal OTUs were classified against the most recent version of the UNITE reference database (V8). Also here, no major changes in the classification of the OTUs were observed.*

L211-219 and L221-233: Normalization is a critical step during the analysis of microbial datasets that may determine the following statistical analysis as well as the accuracy of the results. The authors should explain here how they normalized their data for bacterial and fungal communities.

*AU: Thanks for pointing this out. The data were normalized using the trimmed mean of M values (TMM) method prior to the final analyses. We added a sentence in the “statistical analysis” section (L229-231 in the revised manuscript).*

L243-245: it is not clear if the problems with the ITS1 data occurred in all samples or if this was observed for only a few OTUs in some animals. Could a normalization step solve these problems? Please clarify.

*AU: These issues occurred only for a few OTUs in some animals. As mentioned above, data were now normalized using TMM as described in the revised manuscript (Please see also our response above).*

L262-263 and L299-302: it is not clear how this was evaluated in this study. Importantly, sequences of the endophyte fungus (at genus level) associated with fescue toxicosis have not been identified in the microbial community of fecal samples. Could the authors elaborate on this?

*L262-263: We have deleted this sentence as we deemed the information on percentage of infected fescue not relevant for the revised manuscript.*

*L299-302: Regarding the lack of detection of Epichloe, we would like to mention that we discussed possible reasons for not being able to detect Epichloe sequences in the discussion section of our manuscript (L587-594 in the original manuscript, L610-618 in the revised version of the manuscript).*

L467: The fact that species of Acinetobacter represent major human pathogens and its potential shedding by animals in the HT group is a matter of concern that should be discussed here.

*AU: Indeed, OTU3 is classified as Acinetobacter and shows highest similarity to Acinetobacter Iwoffii (100% similarity). While the role of A. baumannii as a human pathogen has been well established, the role of A. Iwoffii in human disease is less clear. Some evidence suggests that A. Iwoffii can cause bacteremia in humans. Different Acinetobacter species have been isolated from cattle and other ruminants. It is currently unknown if cattle Acinetobacter are part of the physiological microbiota of cattle or represent opportunistic pathogens for humans. We had discussed the potential implications of Acinetobacter as part of the bovine fecal microbiota in our original manuscript (L523-526). We have expanded the discussion on Acinetobacter in cattle to accommodate the reviewer's comment (L550-556 in the revised version of the manuscript).*

L507 an L610: The concept of dysbiosis is complex and I suggest removing the term in these sentences, as it may not properly apply to the observed phenotype.

*AU: changed as suggested*

L523-526: Please avoid going back to the same result throughout the discussion, as this may confuse the reader.

*AU: We have deleted the first mentioning of Acinetobacter OTU3 in the revised manuscript and thus refer to Acinetobacter OTU3 only once in the discussion (L550-556 in the revised manuscript).*

L543-545: More abundant OTUs are not necessarily the most active ones, especially in this case, where fecal samples are being investigated and results are being correlated with host performance. If any of these taxa survive better during the passage through the GI tract and more DNA is found in the feces, they will be overrepresented in the microbial community.

*AU: We agree that abundance does not necessarily reflect metabolic activity. As suggested, we have modified the discussion to mention this limitation (L566-570 in the revised manuscript).*

Figure 3: to evaluate OTU interactions, it is strongly recommended to apply correction for multiple testing in the microbial datasets and see if these results remain statistically significant.

*AU: Thanks for the comment. We performed a false discovery rate (FDR; Storey, 2002) adjustment. Results are now presented as q-values instead of P-values. A description was added to the text (L232-233 in the revised manuscript).*

Table 1: Could the authors comment in their discussion about the differences in the ergot alkaloid concentration of the tall fescue pastures between the two farms under study?

*AU: As suggested, we expanded the discussion in the revised manuscript regarding the different alkaloid levels and different ergot alkaloids found in the 2 farms in our study. Please see L516-526 in the revised manuscript.*

Tables S1 and S2 are of little information to the reader in its current format. Please consider showing the OTU abundance according to each treatment.

*AU: As suggested, we have modified the supplementary Tables showing the 50 most abundant OTUs so that the relative abundance is shown for HT and LT cattle.*

## Reviewer #2:

The objective of this study was to evaluate the fecal microbial communities (bacterial and fungal) from cattle with contrasting growth performance on tall fescue pasture infected by ergot alkaloids. The idea of the study is interesting but I have some major concerns with this study that needs to be addressed. First when looking at the feces you can not make inferences about the ability of the rumen microbiota to metabolize the ergot alkaloids. You need to focus on the feces microbiota as a biological marker associated with cattle with higher tolerance to fescue toxicosis. Second, the way animals that are more tolerant were selected is a strong limitation of this study as many other factors may influence the AWG of cows, which were not considered or controlled. Third, the authors do not understand well how to report and discuss interactions. If there is an interaction of tolerance x location you can not report and discuss the effect of tolerance alone as this will be different according to location. This will affect the results and discussion of this paper and need to be corrected.

*AU: Thanks for your comments. With regards to the classification of cows as high or low tolerant to FT, we added a comprehensive explanation below as well have modified the text. With regards to the interactions, we partially agree with the reviewer. First, we have changed the way that results are presented to first show the interaction results and then the main effects. For the main effects, we presented results for significant OTUs that did not show an interaction. However, we also presented the results for the OTUs that showed simultaneously significant interactions and main effects only when the direction of the effect was the same. By doing this, we are simultaneously acknowledging that the location/level of exposure plays a role in the OTU abundance between tolerance groups (i.e. interaction) and that, more generally, the difference in abundance still holds regardless of the location/exposure levels, suggesting that this OTU could be used as a general biomarker of FT tolerance. In fact, the statistical hierarchy of discussing interaction and main effects that the reviewer correctly pointed out must be respected. However, when the direction of the effect is the same between "nested" effects (i.e. location), the main effect suggests a more general role of the OTU.*

Ln53: Ergovaline is important and receives more attention but other alkaloids may be just as important in FT. I do not think we have any work that clearly shows that is just ergovaline that is responsible for FT.

*AU: We agree. As suggested, we included a sentence in the introduction stating that other ergot alkaloids may be important for FT as well (L522-525 in the revised manuscript) .*

Ln81-82: change to: Studies published on the effect of toxic tall fescue on gastrointestinal (GI) microbiota are still limited

*AU: Changed as suggested.*

Ln86-86: not "alleviate some of the impact of FT symptoms" but ...reduce the toxic effects of the alkaloids and consequent reduce FT.... or something like that.

*AU: Changed as suggested.*

Ln87-88: what about the rumen protozoa population? Can they have any impact?

*AU: We agree that protozoa might have an impact on FT as well. In this study we focused on bacteria and fungi, and thus didn't mention the protozoa as our primers for ITS-1 are targeting mostly fungi (and not protozoa).*

Ln89: If the microbes capable of degrading the alkaloids are in the rumen, why are you focussing on the feces and not on the rumen microbial populations?

*AU: The reviewer is correct that studying rumen microbiota would be of highest relevance for a better understanding of FT. However, as outlined in the materials and methods and discussion sections of our manuscript, we were not able to sample rumen content as the number of animals (n=149) was too high. We would like to refer the reviewer to the respective sections in the revised manuscript for details (L506-514 in the revised manuscript). We also state the limitations of using fecal microbiota for studies like this.*

Ln108-110: suggest changing it to: "Cattle were managed in a rotational grazing system and were moved to a new paddock every two weeks at each location to ensure adequate forage management as well as sufficient forage availability to the cows."

*AU: Changed as suggested.*

Line118: ...as described by Rottinghaus et al [22].

*AU: Changed as suggested.*

Ln129-138: I wonder how days of gestation would affect those values. What was the variability in gestation days of those cows? Why wasn't body condition score considered in the model? AWG may not be the best way to assess performance or resistant to FT of those cows. If they were growing steers or heifers yes.

*AU: Thanks for the comments. When performing the statistical analysis for the identification of extreme performance cows, we used the effects of parity (which is highly correlated with age) and initial body weight (which is highly correlated with stage of gestation after controlling for parity). Nonetheless, we had evaluated different ways of identifying the contrasting animals for this study. One of them was including the stage of gestation in the model. However, since we were already adjusting for the effects of parity and initial body weight, the effect of stage of gestation did not play any role in redefining the selected individuals. Although we did not formally test BCS in the model, the rationale is similar (BCS is correlated with body weight, which is also impacted by the age/parity). Unfortunately, given that animals were selected for subsequent microbiome analysis (and other analyses not related to this manuscript). We added in the text some explanation why we used parity and initial body weight in the model to try to adjust the data in order to identify animals with contrasting performance (L138-140 in the revised manuscript).*

*With regards to the use of AWG of mature cows for selection, we agree that this might not be the most accurate way to meet with our goals. Given the logistics of the research trial at the time, we needed to make a timely decision. Ideally, we wanted to measure growth in their progeny to then retro-actively identify the cows with contrasting performance. This, however, was not possible. Nonetheless, Mayberry (2018; <https://repository.lib.ncsu.edu/handle/1840.20/35773?show=full>), using the performance data from this project, showed how cows selected as tolerant (hence, greater AWG) had calves with greater growth. Interestingly, this difference existed only in the location where the levels of toxicity were high, whereas this classification had no effect where the levels of toxicity were low. However, due to problems with Mr. Mayberry leaving for a job, in addition of others personal problems, his research paper showing this has not yet been submitted for publications showing these results. In addition, it is worth noting that*

*there are not studies pre-defining how tolerance to fescue should be measured. Hence, we are proposing a methodology in order to advance our knowledge in this very relevant subject for the US beef industry.*

Ln256: Change to: All statistical analyses were performed using SAS 9.4 (SAS Institute Inc., Cary, NC).

*AU: Changed as suggested.*

Ln306-307: you can say there was a decreased species richness (Chao,  $P=0.0078$ ; ACE,  $P=0.0093$ ) in the LT cattle for both sites. Because there was a treatment x location interaction. When that happens, you have to report the result and discuss the interaction and not the individual treatment effect.

*AU: Addressed in our response to the general comment from the reviewer above.*

Ln310-312: The same thing here. Need to focus on the interaction when that is significant.

*AU: Addressed in our response to the general comment from the reviewer above.*

387-388: ...between groups of HT and LT cattle were observed for...

*AU: Changed as suggested.*

Ln396-402: I suggest changing the description of OUT numbers throughout the whole manuscript to their classification. The reader does not know and need to know what is OTU 1 or 2 or 3 and so on. Change this to the classification of each OUT as described in your materials and methods. Again, if there is an interaction you cannot report results of the main treatment alone. This needs to be re-written in the whole manuscript as the way it is written is wrong and confusing.

*AU: We disagree with the reviewer's comment regarding the OTU numbers: We specifically refer to specific OTUs with their numbers as there can be multiple OTUs within a given genus or family and the OTUs provide the highest taxonomic resolution in our dataset. We believe that by removing the OTU numbers, we will lose resolution and specificity of our results as – as mentioned before – the OTUs are the units with highest taxonomic resolution and summarizing them might blur important biological differences as even closely related phylotypes can have substantially different functions.*

*Interaction was addressed in our response to the general comment from the reviewer above.*

Ln:495: delete "e.g."

*AU: Changed as suggested.*

Ln587-593: can it be that *Epichloë coenophiala* was just digested by the ruminal microbiota? Why would you expect to find it in feces? Lots of things are happening before it reaches the feces.

*AU: We agree, we cannot exclude that *Epichloë* might have been degraded by the rumen microbiota. We have included this possibility explaining the absence of *Epichloë* sequences in the revised version of the manuscript.*
